# Supplementary material for: Interday Forecasting and Intraday Updating of Call Center Arrivals
Source: Atypon-hosted journal article supplement (doi:10.1287/msom.1070.0179), 2008-01-05
Supplement: msom.1070.0179-sm-interday_forecasting.pdf [file msom.1070.0179-sm-interday_forecasting.pdf]

# Data Description for “Interday Forecasting and Intraday Updating of Call Center Arrivals”

Haipeng Shen • Jianhua Z. Huang

*Department of Statistics and Operations Research, University of North Carolina at Chapel  
Hill, Chapel Hill, NC 27599, USA*

*Department of Statistics, Texas A&M University, College Station, TX 77843, USA*  
*haipeng@email.unc.edu • jianhua@stat.tamu.edu*

---

**Any user of the data should cite the above paper.**

---

This note describes the data analyzed in the paper. The data were gathered at an inbound call center of a major northeastern US financial firm between January 1 and October 26, 2003. We consider the 42 whole 5-day weeks between January 6 and October 24.

The data contain ten obvious abnormal days:

- six holidays with very low call volumes,
- four days with no data.

We exclude them from our analysis; hence the final data consist of 200 weekdays.

For a particular day, we divide the 17-hour operating period (7am - midnight) into sixty-eight 15-minute intervals, and the data record the number of calls arriving to the service queue during each interval.

The following three files are hosted by the MSOM website:

- **date.txt** gives the date for the 200 days.
- **weekday.txt** contains the corresponding day of the week, Monday=1, ..., Friday=5.
- **data.txt** contains the number of calls during each 15-minute interval between 7am and midnight for each day.

The data matrix is  $200 \times 68$ . The entries are comma delimited. Each row corresponds to one day, while each column corresponds to one 15-minute interval.

**date.txt**

"06/01/2003"  
"07/01/2003"  
"08/01/2003"  
"09/01/2003"  
"10/01/2003"  
"13/01/2003"  
"14/01/2003"  
"15/01/2003"  
"16/01/2003"  
"17/01/2003"  
"21/01/2003"  
"22/01/2003"  
"23/01/2003"  
"24/01/2003"  
"27/01/2003"  
"28/01/2003"  
"29/01/2003"  
"30/01/2003"  
"31/01/2003"  
"03/02/2003"  
"04/02/2003"  
"05/02/2003"  
"06/02/2003"  
"07/02/2003"  
"10/02/2003"  
"11/02/2003"  
"13/02/2003"  
"14/02/2003"  
"18/02/2003"  
"19/02/2003"  
"20/02/2003"  
"21/02/2003"  
"24/02/2003"  
"25/02/2003"  
"26/02/2003"  
"27/02/2003"  
"28/02/2003"  
"03/03/2003"  
"04/03/2003"  
"05/03/2003"  
"06/03/2003"  
"07/03/2003"  
"10/03/2003"  
"11/03/2003"  
"12/03/2003"

"13/03/2003"  
"14/03/2003"  
"17/03/2003"  
"18/03/2003"  
"19/03/2003"  
"20/03/2003"  
"21/03/2003"  
"24/03/2003"  
"25/03/2003"  
"26/03/2003"  
"27/03/2003"  
"28/03/2003"  
"31/03/2003"  
"01/04/2003"  
"02/04/2003"  
"03/04/2003"  
"08/04/2003"  
"09/04/2003"  
"10/04/2003"  
"11/04/2003"  
"14/04/2003"  
"15/04/2003"  
"16/04/2003"  
"17/04/2003"  
"18/04/2003"  
"21/04/2003"  
"22/04/2003"  
"23/04/2003"  
"24/04/2003"  
"25/04/2003"  
"28/04/2003"  
"29/04/2003"  
"30/04/2003"  
"01/05/2003"  
"02/05/2003"  
"05/05/2003"  
"06/05/2003"  
"07/05/2003"  
"08/05/2003"  
"09/05/2003"  
"12/05/2003"  
"13/05/2003"  
"14/05/2003"  
"15/05/2003"  
"16/05/2003"  
"19/05/2003"

"20/05/2003"  
"21/05/2003"  
"22/05/2003"  
"23/05/2003"  
"27/05/2003"  
"28/05/2003"  
"29/05/2003"  
"30/05/2003"  
"02/06/2003"  
"03/06/2003"  
"04/06/2003"  
"05/06/2003"  
"06/06/2003"  
"09/06/2003"  
"10/06/2003"  
"11/06/2003"  
"12/06/2003"  
"13/06/2003"  
"16/06/2003"  
"17/06/2003"  
"18/06/2003"  
"19/06/2003"  
"20/06/2003"  
"23/06/2003"  
"24/06/2003"  
"25/06/2003"  
"26/06/2003"  
"27/06/2003"  
"30/06/2003"  
"01/07/2003"  
"02/07/2003"  
"03/07/2003"  
"07/07/2003"  
"08/07/2003"  
"09/07/2003"  
"10/07/2003"  
"11/07/2003"  
"14/07/2003"  
"15/07/2003"  
"16/07/2003"  
"17/07/2003"  
"18/07/2003"  
"21/07/2003"  
"22/07/2003"  
"23/07/2003"  
"24/07/2003"

"25/07/2003"  
"28/07/2003"  
"29/07/2003"  
"30/07/2003"  
"31/07/2003"  
"01/08/2003"  
"04/08/2003"  
"05/08/2003"  
"06/08/2003"  
"07/08/2003"  
"08/08/2003"  
"11/08/2003"  
"12/08/2003"  
"13/08/2003"  
"14/08/2003"  
"15/08/2003"  
"18/08/2003"  
"19/08/2003"  
"20/08/2003"  
"21/08/2003"  
"22/08/2003"  
"25/08/2003"  
"26/08/2003"  
"27/08/2003"  
"28/08/2003"  
"29/08/2003"  
"02/09/2003"  
"03/09/2003"  
"04/09/2003"  
"05/09/2003"  
"08/09/2003"  
"09/09/2003"  
"10/09/2003"  
"11/09/2003"  
"12/09/2003"  
"15/09/2003"  
"16/09/2003"  
"17/09/2003"  
"18/09/2003"  
"19/09/2003"  
"22/09/2003"  
"23/09/2003"  
"24/09/2003"  
"25/09/2003"  
"29/09/2003"  
"30/09/2003"

"01/10/2003"  
"02/10/2003"  
"03/10/2003"  
"06/10/2003"  
"07/10/2003"  
"08/10/2003"  
"09/10/2003"  
"10/10/2003"  
"14/10/2003"  
"15/10/2003"  
"16/10/2003"  
"17/10/2003"  
"20/10/2003"  
"21/10/2003"  
"22/10/2003"  
"23/10/2003"  
"24/10/2003"

**weekday.txt**

1  
2  
3  
4  
5  
1  
2  
3  
4  
5  
2  
3  
4  
5  
1  
2  
3  
4  
5  
1  
2  
3  
4  
5  
2  
3  
4  
5  
1  
2  
3  
4  
5  
1  
2  
3  
4  
5  
1  
2  
3

4  
5  
1  
2  
3  
4  
5  
1  
2  
3  
4  
5  
1  
2  
3  
4  
2  
3  
4  
5  
1  
2  
3  
4  
5  
1  
2  
3  
4  
5  
1  
2  
3  
4  
5  
1  
2  
3  
4  
5  
1  
2  
3  
4  
5  
1



5  
1  
2  
3  
4  
5  
1  
2  
3  
4  
5  
1  
2  
3  
4  
5  
1  
2  
3  
4  
5  
1  
2  
3  
4  
5  
2  
3  
4  
5  
1  
2  
3  
4  
5  
1  
2  
3  
4  
1  
2

3  
4  
5  
1  
2  
3  
4  
5  
2  
3  
4  
5  
1  
2  
3  
4  
5

**data.txt**

208,186,208,289,528,668,866,1085,1470,1656,1843,1877,1953,2034,1947,1951,1928,18  
73,1914,1905,1837,1818,1451,1642,1590,1522,1586,1570,1517,1717,1747,1731,1635,16  
51,1580,1595,1412,1396,1323,1175,996,836,717,726,631,593,641,600,572,528,522,512,  
433,393,394,307,316,315,298,282,236,231,212,164,144,153,134,129  
236,253,224,306,525,652,811,958,1231,1489,1598,1637,1564,1723,1671,1682,1661,169  
5,1639,1573,1634,1640,1494,1523,1509,1465,1579,1429,1548,1577,1501,1454,1469,147  
8,1446,1508,1313,1241,1162,1005,815,762,661,647,565,571,520,485,460,443,438,402,3  
56,353,347,334,277,293,266,262,236,210,159,152,126,120,135,123  
226,234,224,275,483,595,717,883,1210,1389,1496,1556,1531,1564,1547,1582,1579,155  
0,1511,1561,1502,1490,1497,1392,1482,1486,1435,1522,1510,1461,1372,1599,1392,143  
5,1372,1406,1215,1157,1156,945,810,712,721,703,600,556,586,462,461,483,450,399,35  
6,340,331,315,284,283,267,225,211,194,182,183,148,141,123,114  
252,225,265,285,517,623,764,957,1260,1415,1503,1529,1465,1538,1557,1599,1504,157  
4,1502,1498,1407,1501,1445,1425,1404,1356,1427,1440,1473,1497,1385,1521,1380,145  
8,1410,1359,1260,1214,1135,979,823,741,697,681,585,553,467,497,448,442,422,440,33  
0,314,349,275,229,275,281,199,199,219,181,173,150,132,111,70  
266,289,299,369,503,580,782,970,1303,1447,1552,1616,1524,1637,1663,1672,1580,168  
2,1549,1559,1544,1500,1477,1590,1438,1451,1485,1532,1495,1583,1491,1494,1560,140  
4,1510,1380,1341,1318,1182,1079,807,737,664,651,568,495,497,478,404,377,372,302,2  
66,247,235,225,345,372,266,236,211,182,153,126,142,117,90,83  
200,193,223,292,539,615,853,1076,1511,1689,1887,1890,1824,1876,1954,1816,1844,17  
92,1802,1813,1701,1789,1737,1719,1657,1671,1668,1754,1694,1696,1654,1636,1631,15  
34,1549,1659,1549,1473,1339,1202,955,835,833,749,733,705,628,558,539,558,517,473,  
415,370,353,311,307,292,280,241,263,217,206,168,147,146,127,79  
264,244,292,321,597,722,871,1042,1472,1581,1694,1793,1876,1832,1806,1874,1830,19  
11,1765,1713,1613,1681,1565,1631,1529,1529,1524,1709,1548,1586,1525,1520,1537,14  
66,1393,1331,1348,1267,1156,1015,846,736,652,674,550,497,474,477,471,413,412,424,  
378,348,303,298,304,256,269,232,221,195,173,169,138,115,101,66  
287,295,289,359,581,713,877,1012,1381,1580,1641,1560,1638,1645,1620,1637,1716,16  
12,1587,1560,1500,1515,1498,1448,1476,1402,1595,1544,1509,1516,1536,1476,1439,14  
65,1425,1378,1313,1260,1151,956,784,717,694,658,572,572,549,493,473,468,428,439,3  
74,343,309,299,273,271,254,215,193,189,187,178,139,138,101,73  
250,278,291,346,562,650,862,998,1312,1437,1579,1567,1587,1575,1623,1668,1600,157  
3,1566,1530,1480,1473,1428,1469,1405,1485,1482,1394,1443,1548,1489,1448,1476,137  
3,1444,1304,1286,1274,1202,1083,846,761,678,634,611,571,542,518,430,419,412,394,2  
96,305,300,292,280,240,225,235,210,161,207,168,135,131,109,87  
272,315,329,355,539,699,829,991,1330,1467,1579,1637,1633,1665,1644,1656,1640,161  
9,1674,1499,1529,1524,1468,1522,1478,1494,1436,1436,1467,1506,1488,1496,1462,155  
7,1504,1536,1355,1302,1130,1056,872,794,691,619,550,524,467,405,377,354,317,325,2  
89,213,219,206,219,193,165,146,151,155,139,112,112,67,81,68  
202,204,225,281,555,677,858,1150,1608,1818,1923,1960,1939,1975,1944,2031,1870,19  
57,1818,1838,1881,1808,1752,1703,1751,1701,1781,1770,1675,1726,1671,1682,1652,16  
96,1633,1635,1562,1471,1387,1204,951,885,774,800,704,647,626,598,566,568,517,466,  
375,364,372,321,325,284,272,282,232,218,183,174,157,136,104,107

234,223,268,290,632,657,960,1123,1481,1632,1775,1841,1815,1818,1794,1875,1736,17  
32,1749,1769,1619,1620,1558,1540,1628,1711,1568,1525,1555,1593,1532,1583,1576,15  
37,1453,1523,1278,1273,1194,1057,853,837,697,673,596,562,507,542,506,462,414,392,  
356,334,301,289,273,234,224,232,189,188,198,192,139,100,118,96  
256,257,261,288,501,640,807,996,1282,1450,1641,1565,1641,1618,1713,1676,1529,156  
2,1539,1574,1469,1518,1602,1478,1552,1451,1448,1425,1491,1518,1436,1472,1373,145  
4,1437,1443,1294,1248,1177,1026,912,761,691,694,604,585,498,504,431,407,387,378,3  
06,338,304,291,272,253,235,225,203,203,160,155,101,137,98,92  
228,212,241,261,547,615,883,1072,1287,1426,1616,1635,1660,1713,1748,1648,1681,16  
59,1666,1597,1646,1576,1520,1404,1483,1516,1522,1577,1457,1474,1486,1558,1443,15  
82,1471,1551,1422,1317,1218,1050,876,818,695,684,613,492,440,418,395,379,339,322,  
273,242,252,200,187,184,191,137,145,142,143,108,113,113,97,86  
152,146,201,252,473,631,838,1047,1447,1599,1789,1804,1819,1837,1910,1903,1830,18  
15,1769,1799,1787,1746,1756,1673,1698,1758,1783,1700,1672,1733,1662,1861,1671,15  
94,1722,1660,1567,1550,1381,1276,1023,981,858,752,706,645,620,657,574,508,503,460  
,394,404,363,344,328,333,251,217,252,236,185,189,168,135,104,58  
235,238,227,281,509,659,810,1049,1399,1510,1678,1671,1786,1721,1762,1732,1644,16  
74,1588,1671,1599,1605,1520,1514,1486,1515,1556,1580,1547,1506,1506,1494,1402,13  
41,1424,1407,1260,1250,1077,1045,843,754,786,622,583,589,463,433,417,392,359,318,  
318,302,320,274,244,220,245,214,184,170,171,151,152,120,99,96  
208,204,262,281,477,594,733,913,1266,1348,1518,1549,1554,1588,1567,1639,1560,162  
4,1539,1585,1505,1495,1463,1492,1432,1399,1457,1441,1468,1456,1464,1508,1424,138  
7,1382,1348,1276,1171,1123,977,797,760,693,618,529,575,480,469,418,393,394,382,31  
3,280,284,285,269,260,249,191,209,206,197,144,125,110,113,93  
221,230,293,360,558,580,775,1008,1245,1451,1554,1504,1559,1560,1585,1489,1555,15  
30,1463,1593,1488,1490,1482,1525,1463,1378,1440,1432,1357,1320,1354,1458,1390,13  
47,1382,1279,1248,1275,1191,1069,923,830,694,688,591,569,492,474,429,433,455,422,  
387,303,288,303,289,259,253,240,222,233,188,142,157,144,118,116  
395,327,381,445,700,764,974,1095,1539,1686,1745,1768,1797,1827,1765,1814,1791,17  
84,1724,1758,1541,1626,1527,1569,1538,1511,1529,1564,1564,1558,1592,1694,1669,15  
53,1485,1575,1409,1350,1245,1091,941,866,751,693,613,619,520,532,443,434,421,356,  
335,285,267,266,229,216,187,187,176,178,152,117,131,112,96,112  
297,289,321,382,711,858,1033,1164,1740,1785,1926,2056,2093,2070,2039,2140,2017,2  
028,1928,1890,1875,1835,1830,1869,1745,1786,1829,1769,1737,1789,1833,1825,1841,1  
705,1773,1770,1673,1547,1432,1318,1058,963,821,780,755,710,633,578,552,524,481,47  
2,422,392,404,340,316,325,284,241,262,211,197,192,176,135,105,95  
292,251,300,348,590,600,869,1035,1363,1515,1706,1754,1806,1788,1840,1880,1790,17  
67,1727,1695,1621,1529,1631,1609,1471,1483,1530,1492,1652,1587,1616,1588,1532,16  
00,1472,1446,1353,1329,1224,1098,1179,1092,900,784,689,669,600,557,456,457,440,42  
0,324,354,339,286,360,304,279,262,229,208,201,170,152,133,113,88  
281,254,346,350,594,722,875,1053,1387,1504,1645,1736,1711,1675,1590,1605,1569,15  
56,1507,1509,1512,1469,1453,1541,1467,1463,1477,1440,1407,1443,1425,1507,1468,15  
03,1472,1493,1312,1280,1152,1078,882,772,751,664,591,548,504,497,434,412,434,414,  
362,366,320,257,273,265,240,239,222,187,188,174,160,120,125,95  
280,277,325,365,579,649,829,1023,1379,1500,1553,1591,1631,1608,1608,1696,1545,15  
46,1586,1521,1386,1485,1383,1399,1365,1377,1369,1463,1398,1450,1387,1422,1510,13

91,1359,1397,1328,1219,1042,1059,869,792,707,651,556,477,429,432,423,350,395,353,  
298,285,262,298,259,247,235,217,201,176,170,137,130,123,93,86  
247,218,265,320,494,587,717,870,1163,1316,1455,1476,1514,1601,1529,1685,1593,163  
0,1515,1591,1483,1476,1431,1472,1337,1385,1414,1421,1359,1374,1491,1481,1428,138  
1,1364,1311,1216,1122,1129,1063,854,701,664,586,499,434,409,368,378,336,337,311,2  
63,241,255,204,212,184,156,155,158,153,119,111,122,82,90,80  
228,241,256,377,607,751,939,1107,1615,1742,1869,1789,1912,1886,1897,1918,1821,19  
05,1788,1841,1667,1657,1610,1665,1737,1728,1736,1736,1749,1680,1747,1756,1707,16  
04,1718,1598,1549,1543,1354,1237,1114,976,850,805,706,630,604,569,529,562,495,467  
,368,386,373,296,293,253,277,256,251,205,183,170,154,117,120,104  
238,244,301,361,580,650,887,1021,1386,1527,1706,1739,1727,1747,1714,1690,1647,18  
25,1644,1627,1513,1579,1454,1505,1394,1470,1529,1502,1498,1533,1458,1486,1507,13  
71,1412,1385,1266,1299,1089,1039,881,808,672,648,566,542,482,456,461,431,429,398,  
305,331,316,276,274,260,280,203,210,171,156,145,136,128,105,85  
297,267,308,357,560,706,801,1008,1314,1397,1560,1629,1527,1567,1535,1533,1573,15  
56,1538,1537,1401,1415,1484,1389,1332,1453,1407,1433,1389,1456,1366,1455,1458,13  
66,1415,1379,1250,1294,1166,1092,906,827,661,641,574,543,504,429,423,453,396,403,  
318,297,308,269,265,248,241,225,209,180,154,136,139,118,100,84  
340,272,345,410,631,728,940,1084,1277,1529,1614,1650,1581,1568,1677,1625,1697,15  
83,1596,1561,1479,1430,1503,1439,1366,1493,1451,1417,1428,1449,1443,1375,1376,14  
06,1331,1314,1352,1205,1069,994,791,692,652,564,486,434,401,403,378,351,320,279,2  
51,216,215,180,176,162,151,140,129,111,131,110,100,80,70,76  
178,165,239,242,410,501,667,804,1145,1337,1431,1509,1518,1589,1602,1599,1588,159  
3,1564,1549,1370,1431,1440,1558,1452,1467,1532,1530,1504,1470,1515,1400,1381,141  
6,1456,1302,1281,1116,1087,1002,891,763,705,637,555,549,468,441,424,405,423,387,3  
27,339,305,276,270,254,263,220,192,184,170,142,157,112,118,114  
262,230,326,353,580,709,868,1014,1310,1505,1619,1752,1729,1779,1715,1819,1702,17  
07,1691,1645,1562,1551,1555,1459,1496,1480,1487,1515,1534,1522,1600,1539,1443,12  
92,1278,1326,1292,1227,1186,1152,903,792,730,640,559,539,515,501,525,477,434,445,  
360,391,284,304,283,262,272,224,222,192,194,184,162,157,114,90  
283,266,322,366,573,689,811,995,1303,1433,1513,1640,1609,1661,1658,1670,1598,158  
7,1512,1522,1446,1479,1463,1365,1337,1474,1440,1413,1416,1435,1416,1402,1340,141  
8,1312,1341,1255,1295,1105,1067,909,839,677,647,521,540,478,492,442,412,420,404,3  
05,298,284,284,258,260,224,243,204,196,165,127,134,121,109,107  
296,252,318,395,646,677,804,1055,1400,1537,1683,1647,1676,1674,1680,1636,1688,15  
99,1640,1559,1619,1471,1484,1475,1510,1527,1469,1470,1434,1405,1380,1603,1463,14  
45,1406,1394,1334,1222,1147,1051,779,749,645,635,506,461,467,438,425,329,323,284,  
278,286,207,261,222,203,189,169,139,154,126,119,98,111,96,73  
232,208,249,324,599,725,932,1029,1524,1761,1897,1906,1887,1894,1926,1937,2001,19  
28,1786,1850,1767,1778,1696,1684,1655,1766,1736,1721,1719,1804,1731,1713,1677,16  
95,1689,1712,1639,1491,1468,1310,1077,985,892,807,671,610,544,498,506,548,479,450  
,414,387,365,373,296,272,248,256,242,217,196,171,162,146,112,108  
293,260,343,392,628,775,892,1141,1502,1552,1685,1695,1794,1782,1750,1745,1834,22  
88,1654,1782,1801,1623,1751,1676,1768,1598,1657,1628,1648,1598,1617,1630,1563,16  
24,1462,1431,1356,1357,1272,1173,954,847,712,669,584,505,520,457,477,457,397,412,  
331,334,343,330,304,301,263,211,207,194,182,174,123,127,93,81

275,279,287,368,544,649,849,973,1355,1479,1553,1576,1591,1617,1641,1669,1654,157  
8,1641,1575,1515,1473,1489,1471,1422,1449,1535,1438,1377,1465,1377,1321,1383,129  
9,1336,1339,1230,1198,1114,1225,1087,1032,852,786,531,499,464,416,387,398,407,364  
,331,299,282,278,264,258,247,250,183,200,200,130,124,116,109,81  
285,283,283,348,558,691,823,1061,1326,1521,1531,1552,1559,1647,1651,1727,1637,15  
27,1620,1538,1406,1498,1482,1577,1452,1447,1495,1436,1452,1473,1432,1429,1373,14  
24,1372,1396,1364,1284,1252,1196,922,851,776,755,608,595,493,497,490,471,420,408,  
322,318,302,310,303,252,274,200,226,223,196,165,168,122,111,103  
375,251,317,382,685,736,986,1131,1456,1600,1704,1826,1777,1806,1831,1775,1764,17  
97,1713,1681,1730,1599,1577,1586,1521,1599,1573,1564,1563,1572,1525,1643,1488,14  
78,1492,1595,1435,1409,1260,1187,962,908,821,713,625,580,479,440,435,395,370,342,  
279,272,254,280,223,207,196,188,180,139,189,140,102,95,109,79  
350,309,332,433,767,836,1055,1209,1720,1712,1975,2073,2005,2028,2106,2068,1962,1  
962,1893,1922,1809,1880,1785,1798,1739,1692,1810,1752,1808,1762,1740,1783,1676,1  
706,1671,1610,1594,1539,1400,1332,1137,1056,938,819,722,664,619,620,563,570,488,4  
43,418,345,358,329,313,311,275,270,226,210,163,151,123,124,122,82  
306,231,333,389,629,756,903,1066,1498,1587,1770,1817,1830,1802,1775,1734,1742,17  
57,1752,1604,1613,1612,1625,1540,1550,1545,1499,1588,1513,1476,1527,1568,1529,14  
98,1476,1458,1377,1309,1180,1143,897,819,796,674,581,615,508,501,471,501,424,422,  
368,322,313,282,285,274,250,252,212,201,197,160,141,127,106,87  
259,261,272,377,572,683,812,951,1218,1424,1540,1549,1631,1641,1663,1671,1597,161  
3,1563,1518,1582,1498,1523,1527,1478,1498,1472,1485,1443,1545,1460,1429,1438,139  
1,1397,1403,1244,1289,1147,1084,860,796,739,741,605,557,478,431,454,427,406,403,3  
30,294,335,259,293,236,258,236,202,206,169,171,125,104,117,94  
257,192,259,296,513,628,759,871,1215,1308,1417,1538,1507,1448,1450,1440,1518,148  
3,1467,1387,1295,1365,1292,1235,1359,1306,1342,1335,1355,1352,1289,1299,1304,131  
6,1257,1182,1142,1044,959,894,733,767,626,534,523,482,400,376,339,335,358,237,252,  
248,277,277,249,233,233,193,176,183,163,163,140,106,96,72  
314,283,317,361,631,720,878,1036,1392,1511,1637,1655,1589,1706,1653,1579,1589,15  
55,1569,1605,1433,1436,1470,1418,1393,1454,1423,1473,1397,1380,1488,1463,1411,14  
69,1425,1348,1385,1255,1209,1079,865,857,795,683,574,553,477,423,397,404,351,312,  
300,246,249,216,207,214,182,166,143,156,138,140,110,95,76,61  
258,256,313,362,661,793,984,1165,1646,1738,1883,1858,1989,2071,1984,1940,1917,19  
33,1866,1918,1773,1789,1746,1782,1745,1728,1784,1726,1751,1681,1840,1785,1687,17  
39,1645,1682,1561,1479,1327,1302,1091,944,906,804,684,689,627,550,577,479,478,475  
,454,422,391,307,333,257,257,242,217,220,150,160,160,92,94,113  
291,261,351,400,640,744,939,1098,1480,1600,1787,1790,1823,1742,1813,1789,1723,17  
15,1655,1667,1631,1588,1581,1577,1537,1501,1513,1487,1525,1557,1491,1513,1409,13  
79,1428,1346,1249,1299,1086,1029,855,779,689,681,552,565,507,538,459,428,410,420,  
338,328,335,265,275,283,237,214,194,202,195,146,138,112,107,83  
334,278,323,410,648,687,882,1009,1416,1537,1616,1648,1671,1639,1634,1617,1593,15  
82,1612,1551,1480,1518,1506,1441,1438,1510,1424,1420,1428,1435,1406,1426,1485,13  
50,1390,1342,1278,1230,1182,1000,860,772,740,611,634,543,508,472,460,452,425,369,  
335,308,291,282,240,243,222,226,199,158,168,139,132,133,108,78  
299,254,306,372,583,635,831,995,1235,1394,1539,1565,1590,1615,1542,1624,1530,146  
0,1439,1454,1418,1351,1509,1363,1366,1420,1392,1350,1381,1307,1413,1445,1357,135

7,1356,1345,1245,1191,1113,1068,868,905,692,637,603,559,479,473,408,419,352,358,3  
38,293,288,254,244,283,206,234,207,182,175,170,128,115,117,92  
354,256,333,388,658,718,919,1041,1469,1584,1739,1743,1713,1712,1729,1719,1655,16  
08,1538,1484,1630,1510,1485,1512,1483,1435,1451,1452,1470,1490,1464,1451,1454,15  
12,1451,1466,1354,1338,1316,1159,925,834,786,659,597,599,486,446,374,361,348,340,  
266,248,273,249,210,210,169,166,129,145,133,114,104,100,77,74  
285,237,264,369,666,727,996,1151,1520,1826,1815,1880,1799,1885,1859,1782,1809,17  
99,1845,1720,1661,1643,1745,1570,1564,1626,1538,1597,1640,1660,1687,1750,1566,16  
03,1575,1655,1482,1431,1281,1234,978,995,852,798,682,648,614,568,554,521,528,455,  
321,356,346,362,345,331,329,276,236,215,188,149,145,120,136,101  
329,304,357,384,641,786,944,1100,1484,1544,1793,1852,1772,1748,1827,1775,1724,17  
17,1606,1585,1552,1501,1529,1473,1453,1422,1494,1458,1487,1492,1498,1438,1386,13  
60,1446,1325,1219,1246,1176,1086,804,794,707,677,546,524,488,417,455,438,418,396,  
303,327,322,294,259,233,226,220,191,211,178,121,148,117,91,52  
351,326,372,397,556,724,876,999,1368,1502,1723,1655,1744,1634,1667,1640,1570,158  
5,1565,1498,1484,1490,1402,1422,1469,1392,1413,1457,1383,1425,1394,1395,1380,131  
0,1292,1420,1314,1179,1169,1039,872,808,759,645,567,531,506,470,430,408,417,339,2  
91,285,263,300,363,301,265,218,199,146,163,151,91,103,118,75  
278,272,320,377,574,647,805,950,1228,1441,1505,1600,1517,1577,1546,1559,1388,150  
1,1482,1518,1462,1387,1354,1435,1404,1436,1366,1375,1379,1425,1379,1335,1327,129  
1,1360,1343,1231,1152,1166,1003,926,779,782,582,585,557,485,450,425,409,399,354,3  
45,312,284,247,293,275,240,216,185,168,173,138,117,108,91,78  
337,316,351,430,644,740,848,1057,1317,1545,1657,1614,1587,1609,1641,1652,1501,15  
66,1525,1551,1528,1483,1395,1320,1299,1385,1313,1383,1346,1292,1383,1411,1420,14  
70,1438,1438,1261,1202,1123,1055,836,796,748,575,516,549,460,399,409,379,349,323,  
280,270,243,200,243,199,200,164,160,150,157,136,131,107,99,104  
261,247,298,352,618,724,1003,1176,1558,1727,1863,1896,1825,1984,1827,1883,1857,1  
793,1780,1648,1714,1650,1608,1555,1559,1559,1515,1604,1603,1533,1599,1642,1590,1  
555,1562,1562,1455,1395,1252,1261,1040,989,857,829,676,647,545,544,511,538,469,45  
1,363,409,377,340,330,334,282,250,212,229,252,228,212,189,174,110  
367,332,384,433,737,818,1022,1137,1509,1598,1804,1752,1785,1781,1822,1887,1791,1  
631,1705,1683,1600,1630,1557,1519,1441,1477,1491,1489,1407,1446,1426,1339,1398,1  
372,1416,1335,1278,1164,1127,1033,864,755,709,596,525,488,457,436,411,412,405,410  
,351,347,337,291,290,264,251,233,203,181,149,148,124,120,86,76  
310,280,316,366,619,738,841,981,1311,1441,1588,1630,1577,1613,1603,1567,1500,150  
3,1459,1445,1476,1403,1422,1359,1358,1343,1354,1343,1336,1337,1310,1400,1346,134  
3,1301,1279,1176,1102,1056,938,821,755,661,693,546,534,471,484,446,410,423,349,33  
6,322,315,266,267,245,206,213,199,196,164,138,145,104,108,73  
324,297,354,383,624,701,869,965,1295,1395,1535,1501,1597,1579,1581,1581,1600,149  
1,1419,1436,1373,1349,1220,1211,1312,1286,1379,1346,1376,1365,1437,1388,1302,137  
4,1368,1345,1366,1223,1076,1037,846,790,732,623,585,555,469,469,439,404,420,363,3  
09,279,316,281,270,224,250,225,177,168,150,153,145,125,91,79  
401,341,419,468,681,744,959,1047,1308,1589,1547,1594,1649,1652,1611,1608,1562,15  
58,1510,1479,1474,1374,1453,1306,1356,1336,1335,1352,1386,1404,1470,1456,1456,13  
84,1327,1317,1340,1197,1093,1061,851,761,689,703,564,522,476,449,387,323,338,343,  
244,215,200,183,201,165,156,137,140,140,115,122,127,94,76,63

320,283,313,409,723,854,1004,1160,1594,1820,1959,1989,1855,2071,1904,1885,1955,1  
900,1894,1844,1749,1748,1763,1750,1647,1449,1594,1626,1572,1607,1589,1663,1649,1  
587,1626,1596,1450,1501,1347,1321,1069,974,900,833,729,733,615,564,582,556,511,49  
3,401,409,405,358,319,323,285,249,234,213,207,174,121,118,113,93  
463,391,451,487,794,869,1031,1112,1507,1635,1809,1695,1790,1821,1754,1724,1761,1  
776,1612,1655,1498,1526,1522,1517,1449,1479,1478,1511,1480,1392,1473,1501,1377,1  
358,1322,1304,1212,1241,1150,1056,813,764,682,645,610,570,515,502,451,440,423,412  
,347,342,310,291,263,288,229,240,224,183,170,142,131,104,105,78  
343,324,322,406,626,781,889,997,1351,1550,1670,1693,1622,1601,1624,1577,1579,158  
2,1626,1572,1479,1414,1315,1352,1336,1383,1368,1413,1382,1414,1422,1364,1314,136  
5,1334,1308,1270,1232,1118,1025,811,798,706,663,622,530,566,519,444,446,438,406,3  
76,334,318,315,257,287,251,203,201,215,175,150,151,117,100,83  
430,369,375,443,740,814,946,1064,1391,1500,1625,1648,1648,1627,1716,1694,1607,16  
00,1604,1612,1456,1453,1470,1383,1357,1425,1398,1383,1365,1371,1399,1460,1375,13  
65,1357,1339,1283,1294,1104,1037,941,830,730,713,655,595,523,469,454,420,410,373,  
320,280,335,305,244,274,249,226,189,172,166,148,119,97,114,61  
214,229,254,253,447,562,714,864,1170,1431,1498,1569,1593,1705,1617,1602,1548,163  
9,1549,1535,1543,1575,1537,1501,1552,1495,1542,1538,1557,1579,1492,1580,1566,139  
5,1375,1406,1228,1294,1163,1096,929,868,762,754,645,598,539,544,500,446,498,469,3  
53,312,287,317,286,308,280,239,237,207,183,162,171,139,111,92  
247,240,264,288,496,596,652,839,1166,1374,1415,1308,1435,1445,1499,1438,1441,160  
1,1528,1472,1474,1479,1423,1471,1510,1420,1504,1432,1438,1448,1392,1434,1355,129  
8,1343,1404,1278,1303,1075,1086,936,879,724,723,630,567,578,529,469,460,483,457,3  
81,348,332,304,249,255,260,245,257,193,204,178,148,124,115,97  
279,248,306,333,547,605,817,1072,1284,1503,1499,1499,1497,1642,1640,1552,1482,15  
14,1581,1518,1509,1469,1456,1426,1401,1405,1389,1384,1364,1461,1451,1516,1361,13  
05,1416,1409,1381,1211,1191,1140,895,870,763,745,629,578,612,555,503,458,445,441,  
347,321,344,310,271,264,269,232,238,232,187,167,169,157,107,101  
322,268,332,377,569,678,815,948,1254,1482,1522,1498,1625,1585,1617,1606,1278,158  
6,1522,1486,1466,1474,1537,1519,1456,1436,1457,1444,1372,1376,1468,1444,1485,140  
7,1466,1472,1310,1236,1198,1136,918,822,758,762,608,588,526,492,427,416,395,357,3  
33,276,278,260,193,244,206,162,191,146,149,122,106,114,109,94  
203,231,261,313,596,735,889,1134,1510,1734,1974,1836,1906,1922,1976,1890,1834,18  
53,1790,1858,1671,1744,1720,1720,1613,1703,1697,1701,1755,1667,1653,1665,1599,15  
71,1618,1664,1500,1467,1337,1231,1081,1079,843,803,725,766,644,628,569,565,518,47  
0,478,405,428,404,345,314,308,271,273,263,249,211,208,141,128,107  
305,287,382,387,630,768,856,1151,1481,1586,1637,1673,1708,1833,1694,1676,1568,16  
28,1664,1659,1480,1492,1481,1489,1454,1458,1507,1382,1422,1391,1365,1402,1410,12  
92,1301,1253,1229,1123,1095,953,858,732,744,651,591,567,513,502,420,419,374,398,3  
15,319,281,319,322,242,284,251,245,231,190,183,157,128,105,97  
243,292,272,370,534,625,825,921,1212,1324,1521,1505,1440,1449,1530,1539,1415,148  
5,1470,1418,1341,1321,1376,1316,1388,1358,1269,1310,1273,1255,1314,1215,1310,118  
4,1280,1230,1153,1143,975,914,748,766,700,669,618,534,496,457,454,419,377,364,321,  
316,287,242,270,251,258,218,201,178,180,135,140,122,95,72  
273,256,261,359,543,651,743,995,1172,1381,1495,1560,1517,1458,1519,1510,1502,149  
9,1480,1496,1434,1339,1389,1293,1325,1367,1354,1409,1438,1373,1376,1398,1348,132

2,1270,1345,1238,1202,1107,1044,931,878,727,698,633,581,500,501,426,400,383,365,283,277,292,249,253,235,218,208,175,225,170,174,152,96,103,89  
302,269,272,352,530,663,820,909,1247,1467,1485,1522,1575,1536,1644,1562,1511,1582,1474,1433,1366,1429,1315,1437,1302,1243,1299,1273,1264,1225,1262,1204,1184,1151,1107,1021,1011,978,864,812,738,640,584,589,486,439,429,383,389,370,328,288,242,215,202,187,224,167,176,167,153,139,120,132,100,102,68,67  
231,179,229,291,492,690,875,1022,1409,1510,1668,1755,1634,1717,1765,1725,1610,1651,1617,1548,1543,1497,1543,1573,1450,1431,1469,1506,1540,1493,1409,1457,1385,1397,1308,1345,1308,1175,1099,1058,866,839,776,674,652,580,568,562,502,486,491,459,365,323,328,309,292,253,217,223,205,185,176,163,140,141,115,95  
245,229,277,279,529,650,772,915,1230,1429,1552,1566,1635,1716,1729,1660,1578,1648,1553,1514,1518,1449,1472,1447,1371,1391,1432,1356,1388,1438,1366,1422,1367,1381,1349,1311,1210,1123,1100,943,796,777,713,608,524,556,478,431,421,448,420,411,294,293,317,259,250,249,223,204,210,162,172,142,120,126,122,104  
246,253,280,305,485,624,799,911,1226,1349,1486,1512,1502,1458,1527,1524,1441,1528,1493,1431,1376,1391,1353,1317,1330,1306,1343,1295,1361,1341,1339,1339,1312,1279,1208,1256,1145,1126,1003,957,848,740,742,634,577,544,477,484,430,407,397,417,352,331,325,283,304,245,227,198,172,180,162,169,146,113,79,90  
269,223,282,357,548,567,749,918,1220,1364,1402,1467,1516,1467,1526,1530,1509,1503,1388,1395,1321,1337,1371,1346,1282,1256,1252,1222,1225,1309,1310,1371,1237,1216,1278,1258,1133,1200,1106,948,841,726,723,647,571,626,538,506,452,479,430,400,345,278,305,293,297,204,199,214,211,197,189,156,120,119,123,94  
306,259,309,369,591,713,838,986,1258,1402,1497,1496,1515,1518,1574,1565,1468,1488,1473,1367,1293,1321,1303,1299,1243,1305,1322,1254,1289,1223,1273,1246,1279,1314,1299,1188,1141,1075,1043,975,793,732,627,635,539,511,452,470,379,365,348,310,285,234,250,224,216,200,166,170,153,128,132,113,119,95,94,63  
237,210,277,321,612,672,867,1018,1488,1571,1674,1648,1670,1822,1834,1731,1710,1735,1622,1511,1546,1564,1499,1477,1376,1388,1410,1465,1377,1449,1428,1416,1486,1406,1444,1337,1288,1230,1196,1054,881,872,725,665,588,643,588,514,526,511,455,447,386,376,337,326,324,302,270,250,261,224,185,154,123,127,98,110  
274,249,279,362,568,665,824,954,1266,1471,1545,1636,1567,1543,1539,1559,1449,1435,1480,1490,1387,1366,1331,1318,1282,1283,1369,1267,1353,1339,1308,1314,1273,1273,1228,1209,1134,1136,964,963,845,702,677,635,525,530,482,449,449,415,401,376,336,320,276,285,310,273,272,221,217,192,177,168,142,130,118,69  
314,289,313,367,565,678,844,965,1268,1430,1530,1466,1513,1508,1549,1535,1473,1448,1400,1374,1385,1383,1379,1345,1263,1216,1313,1238,1243,1253,1328,1318,1211,1217,1260,1207,1107,1124,1021,923,846,722,659,649,564,540,523,485,410,435,429,391,307,327,312,291,317,239,271,234,202,205,193,176,138,124,108,113  
453,302,386,444,636,743,861,968,1291,1487,1583,1561,1564,1558,1598,1633,1584,1526,1534,1485,1495,1460,1417,1437,1338,1349,1368,1457,1367,1365,1391,1343,1266,1283,1317,1289,1189,1163,1085,1078,922,731,732,687,622,575,560,528,497,460,434,436,368,326,301,274,288,254,255,252,205,215,212,186,152,130,122,96  
395,292,348,400,675,722,914,1011,1375,1483,1554,1625,1578,1590,1657,1543,1528,1489,1488,1451,1412,1409,1345,1376,1398,1330,1362,1344,1394,1333,1384,1394,1309,1281,1242,1309,1262,1141,1076,1085,806,718,686,627,531,518,470,445,404,387,358,345,258,264,214,229,223,187,167,166,142,141,131,116,87,108,89,91

265,228,295,296,592,711,891,1088,1395,1682,1714,1742,1765,1805,1815,1725,1686,17  
63,1675,1695,1597,1562,1592,1581,1537,1509,1482,1490,1569,1540,1545,1538,1486,14  
71,1465,1458,1301,1332,1167,1115,969,923,779,701,710,622,585,621,541,455,484,443,  
329,362,349,362,311,255,247,225,226,183,172,164,156,136,110,75  
273,251,286,354,550,656,766,932,1292,1428,1486,1522,1615,1554,1667,1601,1613,159  
4,1626,1592,1457,1450,1501,1507,1385,1399,1407,1415,1210,1431,1466,1427,1360,128  
0,1387,1329,1267,1168,1097,991,877,731,669,642,566,531,559,523,425,426,440,390,34  
7,322,306,285,294,245,225,236,237,211,176,176,140,119,85,91  
264,282,301,309,513,631,768,952,1183,1363,1474,1494,1490,1421,1532,1458,1432,140  
4,1437,1398,1353,1278,1319,1345,1261,1266,1244,1330,1319,1303,1240,1235,1270,127  
8,1272,1255,1132,1061,1021,953,818,718,607,612,519,518,512,467,437,438,393,372,29  
4,312,258,250,265,266,251,196,199,175,174,138,150,110,90,83  
292,221,271,305,517,568,707,878,1152,1347,1459,1427,1418,1492,1433,1539,1497,145  
9,1429,1381,1351,1357,1347,1262,1329,1351,1263,1303,1271,1278,1330,1331,1333,129  
2,1313,1275,1165,1085,1064,969,882,710,695,648,590,534,526,472,439,415,383,375,33  
0,300,298,257,264,242,233,225,205,195,150,149,129,116,114,99  
280,268,299,374,542,677,839,932,1239,1325,1503,1381,1574,1567,1473,1519,1455,144  
8,1403,1371,1405,1345,1349,1284,1348,1250,1250,1418,1248,1279,1324,1309,1286,133  
8,1310,1292,1224,1100,1036,922,766,738,651,573,554,536,489,408,345,373,364,331,27  
3,261,229,223,181,201,186,190,141,144,176,116,118,109,93,71  
209,214,253,303,542,683,841,952,1399,1525,1752,1729,1834,1853,1803,1724,1646,169  
8,1756,1649,1648,1617,1630,1577,1606,1625,1605,1597,1591,1692,1589,1625,1542,154  
9,1555,1564,1392,1328,1160,1126,964,903,811,781,706,651,580,645,569,526,512,453,4  
32,393,372,310,301,269,295,241,231,212,190,187,158,131,110,85  
304,240,325,367,563,678,846,995,1353,1479,1623,1668,1639,1634,1655,1659,1630,159  
8,1519,1495,1515,1385,1465,1453,1373,1339,1363,1364,1384,1350,1385,1339,1290,132  
3,1363,1244,1151,1132,1022,970,831,718,671,625,593,522,533,484,471,445,446,442,31  
0,309,304,310,251,217,232,229,223,213,187,159,130,119,100,88  
303,271,335,328,551,631,847,924,1215,1345,1507,1545,1615,1505,1476,1521,1486,144  
8,1436,1443,1359,1431,1332,1317,1287,1230,1324,1299,1320,1299,1357,1307,1247,124  
4,1216,1153,1125,1077,1007,923,744,653,645,583,563,550,524,464,455,420,418,382,33  
6,319,275,252,283,223,218,206,177,188,156,137,124,114,98,106  
331,274,307,380,580,679,894,1064,1320,1402,1602,1492,1553,1512,1547,1535,1435,14  
41,1418,1410,1336,1340,1387,1291,1297,1338,1358,1362,1325,1347,1337,1366,1256,12  
70,1233,1328,1237,1191,1026,980,820,715,675,651,588,589,532,468,464,405,432,394,3  
72,333,303,265,251,250,227,212,202,191,161,142,105,113,113,89  
309,268,342,361,619,631,862,963,1267,1430,1552,1576,1612,1527,1535,1555,1516,157  
3,1530,1453,1415,1400,1394,1394,1331,1382,1365,1300,1327,1380,1527,1463,1441,134  
4,1390,1276,1249,1243,1017,1006,947,789,685,632,641,569,480,463,444,411,341,331,2  
89,261,243,228,245,226,195,170,166,138,133,121,96,101,101,74  
208,205,265,357,636,744,999,1147,1546,1685,1908,1894,1903,1842,1853,1863,1814,17  
80,1771,1788,1819,1710,1643,1599,1598,1508,1545,1526,1616,1550,1540,1644,1579,15  
54,1504,1492,1395,1340,1239,1115,993,909,810,800,638,650,590,572,563,513,515,510,  
391,360,373,342,325,257,304,224,247,245,186,173,138,138,116,94  
315,277,319,391,569,686,919,1008,1317,1518,1666,1610,1671,1677,1662,1545,1558,15  
00,1473,1499,1477,1452,1493,1371,1348,1350,1406,1352,1308,1248,1308,1353,1305,12

45,1269,1238,1139,1174,969,1010,718,820,691,630,585,543,482,455,414,421,431,399,3  
12,304,296,236,258,255,215,194,176,195,174,161,137,117,117,74  
278,279,262,320,588,618,757,924,1183,1394,1567,1438,1484,1623,1539,1547,1498,151  
8,1438,1447,1384,1331,1313,1415,1348,1333,1348,1388,1359,1370,1373,1347,1314,140  
0,1344,1266,1177,1132,980,956,812,783,685,612,562,582,475,496,456,428,420,444,315,  
295,279,249,247,225,199,179,165,202,166,148,134,141,92,92  
282,266,294,351,497,630,705,961,1237,1331,1481,1466,1521,1526,1506,1478,1496,147  
6,1392,1436,1362,1387,1298,1336,1337,1373,1333,1342,1339,1335,1326,1311,1266,131  
3,1343,1269,1250,1137,1067,977,893,825,726,608,584,533,485,451,419,445,419,413,35  
3,343,289,283,257,228,243,206,190,177,173,143,126,100,103,107  
333,323,315,324,567,648,754,955,1271,1288,1476,1489,1556,1561,1587,1610,1527,156  
8,1483,1435,1455,1431,1415,1291,1330,1385,1416,1400,1350,1447,1337,1460,1372,131  
7,1269,1303,1203,1173,1066,942,788,762,659,630,573,505,451,429,373,358,355,331,28  
5,280,213,210,163,185,164,146,142,145,122,113,109,94,96,63  
322,314,330,385,710,843,994,1159,1641,1676,1870,1919,1952,1948,1806,1919,1884,18  
63,1795,1764,1736,1698,1666,1688,1715,1732,1695,1750,1662,1723,1650,1605,1672,16  
79,1619,1614,1458,1414,1216,1161,1072,985,850,815,698,716,642,601,520,568,531,515  
,432,417,372,369,356,304,292,257,243,215,200,171,170,144,128,98  
332,283,280,360,625,707,913,1031,1372,1568,1753,1719,1726,1734,1715,1643,1514,14  
56,1566,1618,1549,1524,1540,1444,1403,1405,1476,1409,1470,1435,1264,1493,1454,14  
09,1351,1351,1275,1203,1075,1013,845,776,747,677,596,571,512,566,442,483,428,428,  
366,332,336,337,273,278,290,242,197,190,170,145,140,110,97,100  
306,237,319,417,585,683,822,976,1288,1413,1559,1564,1586,1663,1616,1559,1491,145  
5,1514,1416,1353,1385,1377,1454,1383,1440,1391,1392,1487,1421,1379,1353,1362,133  
0,1371,1367,1251,1257,1123,1107,883,752,729,650,597,561,518,552,447,465,410,394,3  
61,378,326,335,316,311,252,254,201,208,203,191,136,126,119,101  
400,331,445,462,708,765,941,1065,1413,1471,1657,1695,1605,1605,1658,1709,1607,15  
56,1589,1494,1428,1430,1452,1428,1401,1429,1345,1403,1473,1442,1431,1460,1413,13  
20,1402,1328,1208,1266,1076,1018,881,845,698,651,604,588,473,434,406,398,344,356,  
288,275,263,231,228,228,208,201,144,175,148,114,108,124,105,102  
298,274,324,402,668,873,1057,1171,1616,1826,1977,1977,1867,1949,1905,1841,1828,1  
903,1850,1795,1745,1727,1671,1734,1635,1663,1687,1670,1807,1774,1787,1670,1561,1  
628,1568,1631,1432,1427,1284,1267,999,915,882,810,707,674,630,556,571,540,480,485  
,424,390,386,356,352,326,345,297,257,245,248,176,175,140,121,111  
389,324,371,450,711,798,1012,1135,1487,1531,1663,1764,1734,1717,1654,1705,1646,1  
613,1636,1572,1523,1485,1451,1467,1359,1427,1375,1402,1440,1473,1416,1379,1404,1  
358,1299,1308,1270,1229,1087,1011,790,753,677,658,601,532,527,497,438,451,451,398  
,351,350,295,274,264,264,243,189,205,194,183,144,111,129,108,81  
270,270,275,336,532,625,762,931,1270,1387,1576,1479,1587,1596,1606,1694,1557,161  
1,1555,1875,1850,1506,1460,1591,1724,1449,1486,1417,1426,1474,1463,1498,1442,135  
4,1367,1324,1275,1223,1126,994,868,852,711,657,604,592,557,523,477,448,422,402,37  
4,336,340,293,315,257,258,226,199,197,156,154,157,152,102,93  
282,242,302,349,547,694,824,915,1287,1328,1580,1591,1636,1583,1491,1564,1553,154  
2,1436,1451,1419,1462,1371,1412,1410,1435,1419,1463,1387,1347,1309,1385,1341,147  
4,1402,1400,1282,1172,1100,1059,885,841,679,693,587,558,545,491,457,475,416,391,3  
23,302,325,309,283,276,261,202,224,211,194,178,148,127,129,88

302,265,333,406,656,741,867,993,1338,1537,1557,1572,1437,1668,1637,1699,1513,156  
5,1517,1442,1370,1362,1489,2111,1681,1727,1535,1651,1547,1544,1480,1578,1532,144  
2,1358,1441,1269,1201,1101,966,802,718,684,640,537,513,442,446,411,341,336,325,28  
8,252,251,236,209,173,190,191,157,126,134,119,101,118,102,82  
203,164,228,315,563,724,833,1002,1426,1652,1741,1739,1721,1799,1864,1828,1829,18  
26,1707,1730,1727,1674,1741,1632,1628,1601,1552,1623,1536,1546,1558,1604,1587,15  
57,1483,1459,1282,1306,1187,807,642,564,592,527,435,440,354,381,331,338,328,285,2  
30,223,201,219,187,189,164,177,154,148,124,107,76,81,70,61  
321,281,323,364,589,763,887,1083,1342,1460,1644,1613,1568,1563,1651,1644,1616,16  
36,1564,1505,1409,1456,1380,1352,1381,1355,1414,1464,1375,1375,1379,1364,1422,14  
11,1340,1244,1190,1107,997,902,797,743,653,602,568,531,458,466,455,399,389,383,29  
5,297,338,332,292,250,254,250,201,220,185,178,152,140,115,82  
289,250,291,333,584,635,786,912,1252,1453,1461,1491,1502,1531,1536,1559,1438,153  
0,1495,1465,1364,1337,1376,1387,1353,1302,1341,1417,1343,1296,1349,1347,1295,130  
3,1296,1341,1161,1146,1011,1010,806,739,680,606,550,552,530,500,459,407,355,371,3  
00,314,308,322,283,265,241,191,226,182,179,170,130,109,114,96  
310,242,320,361,507,656,819,887,1287,1438,1435,1540,1568,1571,1585,1462,1528,146  
8,1437,1411,1360,1329,1263,1275,1243,1266,1288,1292,1300,1292,1372,1312,1247,137  
1,1288,1335,1176,1126,1062,988,884,756,691,659,541,558,479,478,426,426,400,382,32  
3,272,307,280,274,277,269,249,217,169,182,147,139,127,124,96  
337,295,358,371,578,694,807,952,1283,1502,1557,1598,1610,1653,1623,1630,1626,157  
3,1565,1483,1470,1467,1393,1421,1439,1387,1448,1440,1472,1401,1461,1452,1427,141  
3,1386,1329,1239,1292,1052,1015,848,838,713,628,530,561,464,428,439,400,352,352,2  
84,258,286,250,221,209,179,175,152,156,126,131,125,87,85,95  
277,297,304,377,642,736,968,1100,1455,1625,1851,1834,1842,1881,1889,1934,1829,18  
05,1822,1714,1712,1688,1684,1660,1635,1616,1719,1615,1622,1633,1649,1594,1594,16  
10,1516,1601,1446,1424,1258,1146,899,903,812,786,723,639,645,594,584,498,494,499,  
400,433,402,354,360,321,298,263,240,237,187,192,154,136,110,94  
309,279,287,374,605,658,917,1087,1358,1452,1730,1698,1696,1733,1732,1611,1642,17  
12,1681,1629,1584,1484,1427,1442,1464,1403,1444,1458,1416,1383,1452,1492,1361,14  
24,1391,1370,1269,1253,1085,1001,834,746,648,660,581,554,510,503,420,386,388,343,  
368,356,357,303,268,284,268,231,237,199,176,160,142,132,98,79  
290,244,265,327,546,635,759,888,1247,1297,1478,1581,1595,1635,1641,1657,1584,177  
2,1541,1557,1601,1551,1529,1470,1453,1395,1437,1540,1463,1354,1438,1495,1416,137  
2,1410,1367,1349,1234,1139,1018,861,787,732,674,570,593,522,492,459,444,364,379,3  
35,356,317,336,282,284,226,242,197,198,193,185,143,134,116,94  
286,244,272,362,548,607,807,858,1225,1394,1467,1534,1505,1555,1554,1491,1533,162  
3,1483,1544,1436,1443,1386,1373,1414,1426,1365,1409,1349,1457,1384,1352,1402,141  
3,1343,1311,1222,1202,1076,1052,904,882,738,749,658,566,539,547,457,412,441,394,3  
56,339,336,302,329,283,278,232,245,187,203,187,153,127,123,104  
323,297,327,362,614,674,845,972,1282,1441,1541,1582,1629,1593,1661,1719,1726,163  
7,1540,1516,1483,1477,1452,1451,1423,1441,1440,1377,1372,1411,1389,1458,1441,143  
6,1318,1368,1249,1270,1090,1054,869,803,677,667,561,508,466,479,421,394,383,358,2  
81,271,246,243,204,194,176,150,169,172,136,123,140,109,92,81  
210,204,286,304,592,721,888,1073,1475,1590,1746,1811,1860,1838,1834,1866,1765,17  
35,1718,1731,1711,1660,1580,1596,1539,1499,1503,1537,1600,1643,1568,1500,1464,14

16,1377,1451,1359,1391,1177,1152,935,817,784,763,630,618,590,513,520,468,456,449,  
333,327,342,325,328,322,284,270,248,231,214,212,157,134,128,115  
285,273,307,357,597,690,855,984,1326,1512,1552,1649,1568,1606,1585,1628,1613,151  
8,1544,1547,1461,1422,1313,1271,1393,1411,1340,1331,1299,1362,1314,1353,1263,123  
8,1262,1277,1164,1101,968,940,807,719,621,612,589,516,487,427,414,401,379,323,342,  
283,299,273,292,254,255,204,224,212,213,202,148,132,107,92  
265,238,301,360,533,639,860,858,1265,1360,1455,1480,1597,1624,1539,1534,1549,150  
5,1445,1443,1382,1334,1349,1364,1219,1240,1260,1304,1384,1391,1382,1344,1371,121  
6,1263,1187,1179,1124,1003,870,825,692,700,633,570,533,491,462,443,377,409,388,32  
3,283,297,288,216,264,240,236,208,174,146,181,178,126,95,95  
273,272,320,371,552,659,814,941,1280,1376,1476,1497,1591,1598,1470,1474,1571,147  
1,1403,1410,1272,1320,1328,1318,1323,1335,1335,1262,1336,1396,1340,1426,1262,133  
0,1315,1211,1192,1138,1056,988,793,758,696,632,549,495,518,467,460,416,390,378,29  
2,290,293,301,285,257,218,204,193,199,205,167,144,102,110,84  
305,248,335,390,590,678,833,1002,1345,1465,1557,1535,1614,1686,1614,1646,1511,15  
99,1476,1504,1541,1422,1346,1394,1379,1342,1437,1423,1376,1425,1350,1416,1443,13  
15,1332,1317,1170,1153,1031,994,786,707,647,655,525,511,500,436,360,397,332,332,2  
44,235,237,209,184,193,179,169,147,160,145,116,112,90,94,94  
299,258,303,361,661,868,1026,1208,1493,1669,1966,1899,2014,2046,1964,2064,1909,1  
977,1859,1797,1817,1829,1928,1924,1836,1848,1780,1663,1667,1678,1681,1679,1683,1  
635,1641,1571,1472,1469,1257,1228,1013,939,845,853,651,683,660,597,563,562,478,46  
9,394,364,395,376,380,325,327,291,263,261,216,170,190,147,129,113  
383,290,386,407,736,848,979,1126,1518,1643,1831,1791,1813,1749,1783,1738,1747,17  
18,1723,1582,1595,1541,1465,1508,1464,1508,1522,1562,1436,1500,1487,1516,1434,14  
02,1331,1274,1253,1229,1077,1010,810,809,695,609,562,530,555,501,455,469,421,392,  
377,323,320,316,319,319,292,238,228,240,214,186,172,127,117,86  
333,300,349,393,635,727,951,1015,1364,1455,1692,1654,1732,1714,1743,1615,1600,16  
19,1299,1293,1421,1362,1304,1316,1463,1344,1368,1452,1505,1386,1485,1532,1463,14  
20,1412,1335,1310,1289,1135,1079,882,809,714,658,606,575,512,514,460,467,442,412,  
351,342,318,307,267,281,254,236,242,210,230,214,178,145,128,125  
410,324,354,394,745,798,942,1102,1448,1476,1689,1831,1726,1731,1671,1689,1638,17  
26,1584,1574,1483,1559,1521,1470,1407,1376,1429,1430,1357,1420,1425,1387,1273,13  
08,1274,1272,1188,1149,966,917,799,708,643,609,502,479,469,367,358,343,355,314,28  
5,228,214,190,187,200,204,187,184,146,140,130,101,100,83,73  
293,254,290,372,748,834,1093,1266,1666,1722,1925,1942,2095,2052,2002,2001,2021,2  
015,1860,1831,1770,1923,1848,1829,1787,1765,1863,1797,1751,1788,1823,1734,1649,1  
740,1671,1586,1529,1509,1362,1235,977,907,798,791,679,642,613,595,533,531,510,483  
,448,371,381,377,369,352,282,268,278,236,254,201,155,141,134,105  
375,306,418,446,762,828,1036,1186,1546,1616,1804,1862,1933,1958,1903,1866,1870,1  
869,1755,1761,1687,1693,1669,1678,1625,1715,1617,1670,1673,1588,1568,1640,1535,1  
549,1499,1393,1412,1311,1245,1137,937,847,750,696,592,619,613,559,549,535,486,446  
,405,352,353,327,344,318,293,285,265,260,242,187,190,153,150,107  
306,290,309,385,617,665,880,996,1325,1496,1637,1726,1636,1659,1614,1587,1694,163  
1,1605,1568,1527,1550,1454,1530,1528,1406,1490,1540,1446,1470,1432,1496,1423,141  
3,1370,1398,1272,1284,1108,983,901,813,688,674,562,497,496,501,480,422,424,445,35  
6,319,342,324,297,298,288,234,208,190,184,180,145,137,119,110

293,260,302,378,557,661,859,957,1271,1397,1510,1546,1559,1625,1660,1697,1570,160  
6,1631,1541,1446,1522,1485,1478,1418,1466,1442,1407,1471,1428,1452,1468,1402,139  
4,1415,1428,1330,1310,1127,1057,892,801,736,644,582,556,532,508,460,477,419,417,3  
60,320,320,331,285,271,238,280,244,229,224,232,207,167,164,112  
283,274,278,326,578,663,873,924,1333,1516,1640,1669,1626,1669,1770,1782,1739,170  
5,1640,1691,1669,1603,1577,1593,1584,1460,1515,1469,1526,1509,1567,1613,1534,154  
3,1526,1470,1328,1316,1189,1064,869,816,736,639,562,553,494,504,446,441,357,332,2  
94,301,240,219,227,221,204,218,190,149,135,151,103,114,91,90  
208,197,253,278,580,725,892,1107,1490,1732,1891,1953,1843,1959,1946,1866,1891,19  
05,1865,1930,1843,1767,1733,1794,1744,1728,1745,1828,1778,1732,1788,1716,1735,17  
19,1769,1599,1547,1488,1362,1246,1087,978,833,842,703,678,618,624,560,517,497,483  
,408,368,395,366,367,305,304,247,238,231,221,190,184,140,128,127  
322,291,358,393,658,762,970,1144,1460,1660,1815,1751,1801,1855,1873,1866,1743,18  
05,1668,1728,1609,1661,1638,1577,1549,1466,1609,1603,1532,1574,1627,1609,1465,14  
74,1493,1470,1320,1272,1228,1106,949,780,706,683,594,557,552,503,427,437,399,374,  
335,341,338,342,284,289,258,252,236,238,191,201,154,143,100,89  
267,232,265,382,591,703,850,1033,1341,1527,1599,1668,1668,1690,1718,1727,1728,16  
79,1697,1578,1535,1526,1573,1483,1506,1486,1476,1500,1472,1570,1503,1602,1554,15  
71,1465,1495,1311,1343,1250,1106,904,803,744,684,619,582,570,548,493,479,460,435,  
375,352,380,281,319,264,239,234,254,223,204,184,138,137,129,91  
317,284,340,369,630,725,844,1007,1383,1533,1665,1741,1637,1740,1729,1660,1701,17  
90,1636,1605,1517,1497,1507,1449,1491,1388,1458,1483,1471,1510,1537,1561,1477,13  
56,1408,1345,1375,1330,1246,1075,881,872,746,700,582,592,540,522,447,452,428,394,  
367,345,316,270,291,286,247,260,222,207,197,176,173,128,137,80  
327,333,339,401,662,741,882,1049,1420,1537,1726,1750,1752,1706,1632,1676,1670,16  
90,1635,1616,1526,1487,1549,1490,1505,1533,1488,1472,1470,1568,1536,1517,1421,14  
47,1380,1378,1357,1309,1189,1005,930,823,708,628,559,532,496,432,381,422,345,300,  
308,242,240,229,197,189,190,163,144,142,152,127,103,106,79,73  
234,226,261,309,610,734,933,1107,1556,1661,1909,2017,1940,2030,1994,2007,1945,19  
63,1886,1789,1803,1802,1798,1797,1702,1737,1741,1781,1737,1734,1681,1748,1655,16  
93,1669,1652,1563,1413,1327,1230,1051,946,867,770,670,662,652,593,535,518,526,504  
,428,399,392,351,304,343,289,257,243,233,217,158,162,142,114,122  
273,266,273,330,627,702,923,1111,1367,1600,1790,1806,1806,1730,1771,1762,1685,17  
84,1651,1666,1667,1635,1595,1607,1568,1563,1485,1489,1506,1533,1524,1517,1490,14  
94,1444,1448,1300,1268,1127,1078,842,757,698,663,591,569,546,489,507,432,459,440,  
315,350,362,307,299,268,248,255,218,194,173,201,133,119,111,94  
269,221,278,319,535,639,788,886,1265,1470,1596,1651,1668,1788,1671,1737,1682,171  
0,1646,1576,1582,1519,1595,1553,1567,1600,1450,1630,1545,1558,1525,1497,1515,148  
9,1475,1456,1394,1271,1188,1063,908,866,729,690,595,577,567,541,475,423,400,392,3  
73,376,334,312,325,320,256,257,261,207,210,142,155,138,130,93  
270,267,300,332,558,674,803,1039,1366,1420,1617,1685,1709,1725,1631,1643,1601,16  
32,1628,1721,1585,1563,1536,1520,1479,1548,1509,1482,1547,1534,1510,1569,1517,14  
64,1439,1470,1346,1385,1175,1121,983,853,781,802,665,638,569,533,470,466,424,409,  
374,302,334,300,337,274,284,280,221,250,214,181,147,155,126,94  
312,296,334,367,588,734,928,1087,1394,1596,1613,1749,1708,1693,1716,1689,1722,16  
77,1628,1566,1460,1470,1460,1504,1454,1444,1521,1485,1452,1457,1468,1491,1451,14

04,1345,1319,1307,1250,1104,1092,892,788,672,670,558,521,482,461,449,392,344,304,  
256,252,246,249,230,210,163,174,164,144,138,130,113,104,86,69  
238,209,283,370,663,830,916,1200,1620,1786,1961,2000,1930,2074,2018,2444,2349,22  
26,2014,1990,1934,1967,1989,1917,1844,1912,1886,1826,1776,1755,1779,1726,1724,17  
50,1647,1661,1524,1495,1272,1204,975,901,855,764,662,635,622,630,547,566,506,475,  
404,379,349,372,350,325,308,304,258,228,193,202,148,146,129,120  
287,267,318,353,639,746,937,1140,1464,1591,1761,1720,1818,1803,1866,1838,1867,17  
52,1781,1777,1609,1637,1598,1613,1538,1488,1528,1576,1541,1552,1461,1490,1552,14  
96,1451,1405,1301,1271,1118,1047,875,849,741,690,652,638,621,487,459,457,442,424,  
347,326,348,320,301,314,299,238,226,220,217,193,140,111,103,99  
307,286,312,399,596,720,908,1004,1322,1465,1681,1594,1648,1615,1627,1693,1627,16  
29,1626,1550,1531,1567,1541,1473,1535,1530,1417,1456,1499,1523,1536,1496,1454,14  
66,1467,1478,1281,1266,1150,1111,877,850,748,676,633,609,581,549,493,469,442,455,  
322,335,323,371,290,281,296,264,239,249,211,173,210,138,140,90  
353,309,376,436,669,763,959,1130,1440,1632,1668,1716,1741,1834,1806,1812,1798,16  
90,1633,1676,1563,1560,1621,1556,1554,1571,1562,1570,1621,1566,1517,1565,1441,15  
09,1528,1455,1378,1293,1216,1139,1007,906,839,764,692,670,590,567,540,502,491,492  
,407,375,454,682,435,412,348,275,290,257,257,200,179,164,158,143  
419,329,414,467,773,878,1040,1207,1552,1714,1803,1857,1889,1959,1842,1855,1882,1  
832,1763,1702,1600,1674,1757,1609,1653,1617,1521,1632,1589,1634,1657,1616,1606,1  
557,1482,1542,1355,1328,1243,1164,1014,923,745,732,666,586,545,536,482,483,408,43  
0,307,323,256,258,235,269,204,201,182,179,168,135,126,116,103,93  
275,235,272,355,692,871,992,1247,1643,1854,2048,2033,2054,2124,2094,2116,2068,20  
71,1997,1988,1941,1847,1793,1889,1834,1808,1806,1820,1780,1812,1812,1927,1720,17  
19,1586,1718,1555,1581,1369,1237,1074,1013,809,788,722,709,717,676,554,482,453,45  
1,421,429,431,377,398,349,323,319,234,242,218,199,188,163,115,97  
327,299,351,422,683,773,987,1165,1459,1617,1773,1858,1816,1908,1864,1912,1863,17  
70,1670,1647,1618,1648,1707,1678,1591,1657,1619,1609,1575,1625,1706,1642,1633,17  
48,1527,1487,1387,1327,1169,1069,871,891,775,655,568,572,558,548,498,439,451,444,  
400,342,318,314,320,267,265,240,237,208,199,210,144,131,138,97  
289,285,315,349,568,755,896,1055,1401,1550,1713,1802,1744,1765,1707,1795,1776,17  
66,1626,1657,1497,1589,1554,1521,1452,1522,1510,1479,1455,1576,1506,1435,1471,14  
32,1435,1430,1296,1225,1166,1101,870,898,785,660,620,623,558,544,454,456,392,449,  
356,331,332,333,289,257,283,257,226,213,182,167,157,152,107,101  
302,300,281,324,624,682,847,1102,1363,1432,1670,1689,1649,1615,1682,1610,1615,17  
16,1566,1481,874,1440,1485,1442,1475,1465,1368,1484,1461,1452,1519,1476,1397,143  
4,1340,1388,1268,1299,1083,1126,894,813,563,662,584,571,560,493,495,457,421,394,3  
81,323,286,263,250,282,272,226,218,209,202,168,132,140,128,84  
299,261,274,385,561,675,829,940,1303,1495,1608,1670,1651,1679,1732,1757,1704,168  
0,1593,1586,1471,1539,1563,1384,1569,1507,1490,1523,1416,1457,1439,1516,1508,143  
4,1383,1370,1278,1191,1022,1074,870,851,696,617,550,533,515,483,385,347,349,339,2  
59,266,242,211,223,202,173,204,156,165,127,126,110,131,120,92  
193,190,252,317,593,719,919,1132,1595,1641,1871,1917,1864,1796,1883,1892,1916,19  
34,1775,1778,1789,1680,1700,1678,1673,1690,1682,1645,1678,1628,1676,1701,1558,16  
12,1529,1657,1446,1405,1268,1230,939,902,818,797,711,665,620,597,554,565,469,480,  
419,354,365,368,322,295,318,271,217,213,201,165,135,138,126,117

270,267,323,347,572,677,891,1036,1373,1579,1695,1718,1746,1716,1733,1698,1712,16  
74,1569,1604,1660,1625,1627,1585,1468,1569,1654,1602,1560,1574,1553,1569,1415,14  
38,1412,1418,1465,1287,1313,1096,923,833,862,679,571,572,535,496,504,485,459,379,  
371,324,324,299,275,272,236,221,200,206,194,185,135,143,120,111  
263,245,261,344,573,633,790,904,1244,1433,1552,1617,1589,1655,1672,1635,1626,162  
2,1626,1585,1513,1547,1528,1432,1427,1401,1468,1410,1444,1512,1432,1513,1430,130  
2,1385,1387,1239,1166,1055,1015,882,808,654,611,598,558,552,524,484,421,438,387,3  
12,299,278,259,296,267,233,220,220,194,180,152,167,138,122,93  
317,259,275,361,583,726,877,1044,1294,1415,1528,1584,1613,1621,1647,1594,1671,14  
89,1514,1480,1457,1416,1450,1399,1333,1406,1359,1339,1389,1388,1481,1326,1413,13  
62,1258,1268,1166,1095,974,803,618,555,538,488,489,424,430,320,337,319,285,231,23  
3,272,228,194,201,207,161,186,155,156,114,120,110,99,93,66  
334,312,358,461,598,714,869,995,1335,1502,1497,1544,1555,1584,1557,1599,1572,159  
0,1565,1576,1447,1423,1388,1397,1345,1375,1335,1324,1361,1421,1304,1397,1334,136  
3,1338,1305,1222,1224,1016,990,822,733,655,609,564,532,515,475,384,404,370,332,25  
7,255,277,203,215,223,176,196,149,168,136,120,126,110,94,79  
255,225,246,330,638,771,966,1165,1510,1666,1808,1879,1828,1939,1947,1962,1832,18  
86,1820,1765,1715,1754,1684,1700,1708,1655,1611,1731,1696,1674,1674,1644,1663,17  
17,1630,1652,1458,1454,1251,1202,984,953,815,731,718,697,623,583,524,489,513,445,  
389,369,397,344,375,339,293,267,277,218,222,189,162,160,147,100  
285,241,296,353,612,707,894,1097,1363,1483,1678,1690,1706,1799,1655,1778,1707,16  
06,1671,1546,1485,1462,1494,1508,1490,1453,1479,1457,1441,1419,1419,1417,1413,13  
99,1332,1334,1199,1242,1085,937,808,773,673,638,615,534,501,490,433,387,417,407,3  
48,283,297,292,268,262,242,244,213,195,176,150,175,155,121,104  
283,249,310,377,582,656,826,985,1306,1463,1544,1511,1573,1596,1602,1566,1512,155  
1,1506,1585,1516,1444,1363,1463,1370,1344,1363,1346,1394,1429,1348,1360,1332,135  
6,1221,1256,1216,1148,1015,935,804,784,677,640,605,581,528,455,451,426,386,401,34  
2,287,310,291,264,260,256,241,217,172,165,152,121,126,112,101  
299,257,313,358,530,618,833,959,1263,1431,1475,1543,1624,1576,1529,1567,1453,156  
9,1415,1427,1448,1448,1442,1387,1336,1349,1355,1423,1338,1385,1340,1418,1363,138  
7,1249,1397,1259,1237,1099,1029,835,798,705,675,548,553,546,554,500,446,387,424,3  
37,272,277,283,279,239,242,251,220,218,168,176,146,121,115,100  
325,301,321,368,578,656,788,1023,1335,1525,1561,1549,1664,1625,1645,1667,1646,16  
70,1501,1553,1405,1542,1448,1421,1435,1436,1444,1374,1420,1376,1463,1403,1384,13  
59,1318,1318,1229,1128,1122,970,890,830,685,639,561,508,457,445,367,394,330,302,2  
61,222,205,231,237,196,200,175,161,140,157,135,119,99,82,79  
230,208,229,262,589,644,833,996,1383,1584,1736,1814,1846,1896,1887,1845,1809,182  
6,1804,1782,1702,1761,1691,1603,1598,1672,1628,1588,1664,1582,1570,1604,1605,150  
6,1480,1498,1475,1344,1260,1164,978,909,798,696,629,661,534,523,523,471,495,439,3  
88,400,351,369,300,296,286,275,209,204,220,187,143,120,114,108  
282,250,283,377,578,664,855,1035,1370,1538,1636,1645,1690,1733,1730,1646,1664,16  
44,1615,1633,1481,1479,1509,1487,1445,1469,1391,1414,1478,1401,1443,1387,1370,14  
26,1388,1362,1272,1147,1137,1032,793,787,673,636,587,539,545,508,468,439,434,435,  
348,319,325,320,270,269,268,254,219,206,184,175,154,111,107,84  
278,255,303,375,538,640,811,1016,1294,1441,1561,1593,1600,1638,1638,1644,1596,15  
78,1496,1436,1408,1455,1450,1319,1349,1350,1417,1396,1382,1397,1405,1332,1290,12

96,1314,1253,1176,1172,1070,1007,809,784,710,681,610,549,503,479,394,405,362,330,  
273,308,353,262,254,224,236,217,177,208,169,186,170,131,114,97  
275,268,320,396,617,677,839,937,1278,1464,1545,1580,1562,1551,1573,1538,1653,162  
8,1530,1514,1427,1343,1396,1365,1385,1390,1375,1391,1474,1406,1381,1359,1339,138  
2,1406,1406,1313,1241,1075,1022,812,804,718,698,635,631,563,547,479,450,463,387,3  
40,300,290,296,272,245,265,233,214,236,205,163,134,131,101,108  
396,395,397,454,721,789,976,1208,1385,1625,1734,1711,1750,1779,1791,1762,1684,17  
44,1656,1619,1562,1592,1495,1504,1432,1496,1433,1483,1408,1491,1436,1449,1457,13  
89,1371,1366,1260,1247,1032,968,829,840,711,686,581,535,503,460,406,363,315,304,2  
81,252,217,214,223,206,168,200,138,157,148,102,107,116,89,68  
334,318,344,421,722,852,1080,1252,1653,1795,2000,1958,1997,2044,2066,2052,2008,1  
977,1921,1924,1878,1841,1910,1977,1831,1873,1830,1843,1756,1814,1791,1771,1712,1  
775,1761,1705,1604,1495,1437,1195,1066,1069,915,900,755,751,668,683,615,567,569,5  
26,480,436,447,377,344,354,341,288,289,271,219,197,190,151,135,120  
423,356,368,454,689,813,966,1146,1511,1634,1796,1842,1787,1854,1826,1808,1805,17  
44,1656,1755,1664,1666,1639,1596,1636,1555,1587,1615,1589,1520,1511,1528,1529,15  
44,1524,1472,1270,1238,1116,1133,916,780,744,697,647,606,560,522,446,502,464,478,  
411,346,311,319,332,302,293,261,260,215,229,185,153,128,144,111  
336,277,330,419,605,719,843,1016,1409,1528,1658,1722,1729,1735,1698,1812,1672,17  
26,1568,1559,1565,1545,1591,1530,1450,1497,1538,1527,1501,1490,1423,1478,1417,14  
02,1380,1434,1335,1263,1231,1110,916,840,782,764,665,617,565,615,533,514,434,432,  
339,309,330,312,319,274,284,263,261,228,202,183,155,149,139,116  
372,333,391,417,615,719,893,1074,1396,1587,1620,1592,1689,1651,1619,1705,1595,16  
46,1600,1606,1527,1415,1426,1416,1425,1359,1396,1442,1453,1457,1463,1422,1406,13  
66,1401,1362,1269,1261,1115,1100,837,840,765,668,587,554,513,449,436,411,383,356,  
318,279,277,228,207,249,201,164,181,159,170,129,130,118,94,100  
220,237,258,342,571,701,824,1107,1517,1698,1860,1764,1859,1833,1719,1824,1798,17  
60,1751,1702,1743,1649,1605,1652,1578,1661,1574,1687,1623,1621,1555,1597,1533,14  
56,1447,1427,1446,1393,1175,1139,1006,887,773,763,681,653,566,524,528,469,484,522  
,404,327,342,361,312,311,272,259,238,221,176,148,148,141,103,101  
268,273,338,365,594,674,832,1009,1336,1545,1527,1649,1555,1548,1602,1621,1693,16  
08,1506,1481,1450,1467,1355,1404,1388,1335,1361,1414,1306,1353,1311,1345,1273,13  
19,1278,1265,1231,1109,1014,981,812,776,635,671,574,547,535,531,468,425,375,419,3  
32,310,266,320,270,253,262,224,215,224,185,154,128,122,101,88  
286,267,325,354,528,617,729,941,1222,1395,1548,1533,1498,1487,1569,1541,1612,144  
7,1510,1462,1387,1367,1382,1418,1396,1330,1328,1420,1330,1407,1384,1427,1279,131  
5,1425,1290,1208,1198,1058,983,845,742,705,656,583,555,506,524,415,378,403,376,34  
5,325,341,293,323,302,250,239,223,227,191,202,149,127,106,75  
290,260,330,356,532,668,813,881,1219,1359,1417,1465,1571,1509,1495,1500,1465,142  
1,1491,1420,1426,1414,1382,1324,1379,1491,1425,1438,1342,1419,1368,1335,1299,137  
3,1284,1246,1191,1221,1053,982,771,785,724,596,546,594,528,506,449,427,413,386,27  
8,342,276,281,264,257,244,226,225,212,171,143,138,125,106,101  
334,311,376,441,610,709,847,988,1375,1449,1545,1516,1507,1504,1503,1544,1492,162  
5,1541,1473,1411,1442,1338,1318,1264,1378,1354,1431,1363,1387,1445,1381,1342,134  
9,1352,1373,1213,1235,1051,971,787,760,749,597,538,516,467,401,400,345,313,337,24  
4,231,212,218,188,222,191,152,164,156,127,120,108,106,96,77

265,245,269,345,647,716,890,1028,1407,1685,1809,1735,1830,1888,1901,1776,1802,1800,1732,1730,1624,1709,1570,1540,1568,1551,1605,1590,1663,1596,1550,1548,1491,1520,1523,1442,1394,1326,1193,1061,975,863,780,683,646,645,615,600,511,531,482,464,383,357,336,321,310,307,263,252,228,191,204,201,183,116,93,76  
269,290,268,378,588,679,824,948,1308,1511,1602,1578,1612,1635,1610,1580,1615,1629,1457,1517,1430,1426,1350,1451,1372,1339,1366,1378,1362,1363,1456,1399,1269,1281,1299,1195,1233,1139,1031,969,793,746,675,596,550,590,466,484,443,398,374,380,320,297,270,306,248,250,275,216,216,220,202,151,156,110,91,101  
295,261,340,310,524,615,740,938,1210,1342,1418,1466,1442,1447,1532,1438,1430,1434,1341,1344,1300,1371,1246,1208,1295,1287,1299,1283,1218,1343,1244,1280,1265,1272,1268,1143,1077,1090,922,913,813,682,617,562,550,542,541,448,378,398,379,371,330,356,318,304,301,269,228,232,204,203,177,151,145,139,91,100  
261,289,265,309,509,613,721,878,1108,1301,1426,1393,1439,1445,1368,1397,1337,1441,1403,1399,1248,1309,1345,1214,1310,1284,1278,1349,1219,1278,1259,1303,1249,1200,1234,1193,1174,1101,993,874,768,707,696,690,546,543,484,469,453,398,409,359,321,254,256,270,226,248,252,188,177,171,175,124,115,111,78,95  
275,272,309,326,550,664,790,916,1205,1315,1488,1483,1544,1531,1746,1606,1572,1550,1503,1531,1492,1459,1427,1459,1378,1315,1356,1394,1374,1385,1397,1387,1354,1336,1398,1354,1222,1233,1092,1044,841,819,682,617,550,546,478,454,400,376,353,293,263,271,220,201,201,190,204,189,183,154,128,153,90,93,84,63  
186,217,229,324,520,615,872,1052,1377,1576,1646,1783,1661,1760,1739,1804,2051,1965,1745,1729,1675,1696,1625,1614,1767,1704,1564,1705,1660,1579,1546,1514,1621,1594,1490,1560,1450,1372,1255,1116,974,913,813,706,666,651,553,516,515,467,442,422,411,345,321,310,304,329,309,266,266,246,235,212,197,145,123,101  
275,247,295,338,542,665,802,955,1262,1429,1603,1528,1626,1641,1604,1648,1540,1520,1461,1505,1568,1535,1528,1419,1480,1439,1404,1404,1366,1344,1406,1378,1386,1259,1335,1256,1160,1114,1034,955,829,720,688,578,565,563,564,485,448,405,401,381,303,327,275,267,272,260,259,211,236,216,180,149,144,107,102,94  
277,251,267,337,511,569,786,943,1214,1405,1424,1527,1438,1456,1457,1498,1420,1421,1394,1391,1401,1396,1298,1247,1252,1222,1342,1298,1288,1269,1292,1262,1164,1157,1217,1217,1116,1044,995,919,759,739,621,589,511,480,482,487,455,401,352,355,331,274,297,258,229,233,241,198,196,190,187,139,145,104,100,93  
283,245,275,337,509,589,750,890,1160,1338,1461,1404,1394,1472,1428,1493,1357,1471,1383,1364,1320,1360,1315,1276,1226,1236,1308,1342,1303,1280,1198,1277,1210,1266,1171,1257,1124,1163,1094,965,802,706,713,620,559,540,477,469,423,406,412,338,284,296,275,280,251,247,230,196,208,180,179,161,129,116,122,84  
210,232,234,312,584,663,923,1040,1407,1631,1714,1774,1752,1704,1721,1754,1726,1783,1718,1692,1668,1607,1634,1618,1536,1502,1583,1622,1619,1620,1544,1504,1576,1581,1398,1476,1315,1264,1189,1115,912,811,764,681,644,673,602,569,534,495,480,437,426,405,384,345,329,294,307,242,244,219,209,168,156,142,126,101  
343,284,306,385,612,741,866,1021,1314,1516,1553,1563,1644,1585,1691,1506,1447,1738,1700,1646,1591,1469,1455,1432,1400,1456,1361,1273,1304,1289,1166,1171,1199,1100,1179,1244,1065,1024,913,921,890,737,699,688,585,598,502,478,465,480,421,376,335,300,336,346,320,308,308,262,241,199,180,173,174,133,108,98  
383,302,338,412,606,733,851,949,1327,1440,1491,1480,1611,1548,1536,1597,1577,1585,1519,1478,1509,1383,1455,1395,1441,1393,1420,1349,1407,1291,1385,1372,1252,130

8,1311,1279,1159,1204,1056,997,818,735,702,626,563,562,513,482,438,424,397,417,34  
0,330,321,259,256,256,275,248,218,210,193,172,135,120,112,88  
284,253,324,354,540,665,806,949,1208,1411,1456,1525,1537,1570,1491,1501,1506,150  
1,1533,1472,1411,1456,1373,1401,1420,1336,1309,1324,1305,1379,1294,1363,1337,133  
3,1361,1324,1228,1133,1078,993,902,782,669,677,579,571,490,506,426,437,408,398,32  
4,319,283,275,276,259,250,230,227,205,161,162,151,113,110,86  
389,369,359,461,677,770,901,1098,1408,1505,1644,1625,1585,1561,1639,1670,1605,16  
49,1562,1538,1555,1467,1449,1397,1416,1558,1477,1470,1463,1471,1443,1442,1407,14  
72,1412,1410,1355,1274,1172,981,844,807,742,626,578,556,484,470,427,372,324,302,2  
63,220,261,217,191,214,223,180,169,143,153,132,127,98,88,79  
200,205,243,318,544,656,866,974,1364,1624,1592,1699,1770,1808,1751,1775,1732,171  
0,1680,1689,1689,1627,1528,1535,1486,1490,1585,1469,1532,1465,1520,1458,1465,147  
8,1388,1384,1258,1180,1155,996,905,848,737,738,593,600,556,507,459,450,432,437,34  
3,307,328,284,306,265,274,240,230,203,181,146,150,110,114,97  
258,240,278,333,558,643,752,912,1281,1391,1463,1455,1471,1522,1626,1592,1588,156  
1,1492,1464,1502,1443,1369,1345,1388,1339,1333,1334,1323,1204,1282,1273,1277,126  
6,1176,1213,1124,1080,989,898,817,727,653,610,578,557,495,452,435,423,418,394,309,  
324,297,292,286,265,245,209,215,214,206,179,137,111,103,86  
279,257,278,326,505,648,761,839,1126,1243,1440,1390,1385,1504,1508,1448,1456,144  
9,1425,1411,1299,1336,1307,1323,1348,1354,1289,1266,1294,1237,1255,1307,1237,128  
7,1199,1222,1209,1107,1023,828,714,688,659,609,568,500,489,413,443,429,380,354,32  
0,301,279,269,271,234,227,193,212,201,167,136,130,97,94,83  
240,234,288,342,494,639,767,900,1197,1369,1412,1398,1459,1556,1447,1433,1535,146  
3,1484,1432,1417,1395,1295,1354,1313,1297,1284,1246,1294,1291,1306,1296,1247,130  
2,1233,1198,1143,1122,1047,894,780,795,694,583,562,518,497,441,436,373,396,355,28  
9,276,289,283,230,264,231,216,199,179,181,149,153,113,108,107  
262,261,296,332,507,634,793,875,1183,1396,1423,1472,1433,1520,1526,1577,1432,146  
9,1469,1483,1394,1375,1335,1332,1329,1349,1387,1294,1372,1251,1393,1384,1396,133  
5,1395,1273,1180,1126,1029,1037,817,752,649,631,538,530,443,396,369,361,310,274,2  
35,240,247,188,208,157,183,181,142,122,142,120,90,97,81,78  
222,220,267,307,545,717,850,1050,1455,1637,1787,1778,1771,1845,1884,1784,1769,17  
67,1724,1676,1635,1571,1549,1621,1551,1526,1608,1564,1538,1436,1492,1400,1462,14  
60,1442,1423,1339,1303,1129,1048,899,808,739,707,642,607,575,517,477,479,480,482,  
429,348,385,345,315,342,277,236,262,223,169,173,164,142,122,93  
314,291,347,376,624,752,935,1062,1383,1477,2153,1842,1813,1837,1871,1848,1821,17  
91,1684,1697,1623,1672,1524,1480,1511,1567,1505,1580,1487,1494,1489,1451,1396,13  
38,1285,1361,1280,1184,1080,937,843,745,673,594,526,527,513,464,371,408,387,321,3  
10,291,335,297,317,258,233,220,217,228,190,181,157,120,99,85  
318,298,322,391,562,647,883,1054,1349,1488,1546,1551,1576,1564,1583,1588,1556,15  
41,1468,1483,1387,1334,1373,1385,1414,1420,1379,1333,1374,1344,1359,1337,1312,13  
82,1309,1284,1187,1148,1048,1039,821,829,720,621,513,512,454,471,377,451,401,400,  
343,274,249,269,250,273,209,193,205,222,162,166,128,98,85,94  
352,338,309,455,692,727,947,1010,1315,1465,1600,1640,1604,1635,1523,1542,1540,14  
74,1531,1449,1380,1412,1404,1392,1400,1333,1393,1333,1323,1382,1349,1380,1319,12  
67,1332,1279,1228,1197,1055,974,828,736,631,598,473,449,420,383,388,324,335,279,2  
57,234,225,200,196,201,166,169,152,127,137,113,108,98,73,74

180,181,209,269,525,655,843,966,1408,1632,1722,1772,1798,1684,1708,1760,1710,169  
6,1648,1679,1709,1611,1602,1598,1537,1601,1526,1505,1506,1612,1603,1521,1588,148  
0,1389,1412,1294,1332,1118,1086,927,875,776,708,700,614,568,580,535,481,449,447,4  
07,384,333,345,322,322,286,271,255,239,200,161,147,127,94,95  
261,204,255,302,474,607,768,902,1250,1479,1565,1645,1641,1587,1575,1628,1805,158  
4,1530,1576,1460,1505,1515,1446,1428,1393,1371,1412,1382,1418,1327,1396,1297,132  
1,1345,1367,1542,1378,1348,1293,1304,1249,1089,784,730,709,644,604,519,462,452,38  
8,352,363,379,342,310,325,303,229,199,246,202,183,182,145,130,97  
257,206,272,326,504,588,748,915,1199,1341,1476,1525,1492,1565,1637,1505,1493,157  
6,1480,1400,1412,1451,1357,1363,1327,1361,1429,1320,1288,1397,1367,1401,1314,128  
7,1334,1207,1182,1150,995,988,835,731,637,627,491,539,491,445,405,429,398,341,297,  
321,294,258,256,269,234,240,210,214,177,145,148,121,89,75  
251,240,278,343,506,612,693,876,1113,1341,1399,1506,1462,1457,1444,1491,1454,142  
7,1487,1402,1409,1376,1280,1316,1294,1287,1387,1346,1304,1317,1354,1347,1328,128  
0,1338,1266,1190,1227,1072,944,829,813,660,623,538,513,487,435,465,427,433,372,33  
5,296,274,265,256,262,236,194,180,162,172,162,141,124,82,95  
281,288,275,387,547,629,801,965,1201,1298,1450,1430,1536,1598,1569,1510,1464,150  
2,1428,1366,1422,1437,1399,1356,1377,1284,1344,1362,1428,1345,1351,1335,1331,132  
0,1308,1289,1195,1157,1083,1046,815,735,609,598,571,496,444,428,345,334,346,320,2  
35,241,240,201,208,230,203,215,177,180,142,141,105,92,94,82

**date.txt**

"06/01/2003"  
"07/01/2003"  
"08/01/2003"  
"09/01/2003"  
"10/01/2003"  
"13/01/2003"  
"14/01/2003"  
"15/01/2003"  
"16/01/2003"  
"17/01/2003"  
"21/01/2003"  
"22/01/2003"  
"23/01/2003"  
"24/01/2003"  
"27/01/2003"  
"28/01/2003"  
"29/01/2003"  
"30/01/2003"  
"31/01/2003"  
"03/02/2003"  
"04/02/2003"  
"05/02/2003"  
"06/02/2003"  
"07/02/2003"  
"10/02/2003"  
"11/02/2003"  
"13/02/2003"  
"14/02/2003"  
"18/02/2003"  
"19/02/2003"  
"20/02/2003"  
"21/02/2003"  
"24/02/2003"  
"25/02/2003"  
"26/02/2003"  
"27/02/2003"  
"28/02/2003"  
"03/03/2003"  
"04/03/2003"  
"05/03/2003"  
"06/03/2003"  
"07/03/2003"  
"10/03/2003"  
"11/03/2003"  
"12/03/2003"

"13/03/2003"  
"14/03/2003"  
"17/03/2003"  
"18/03/2003"  
"19/03/2003"  
"20/03/2003"  
"21/03/2003"  
"24/03/2003"  
"25/03/2003"  
"26/03/2003"  
"27/03/2003"  
"28/03/2003"  
"31/03/2003"  
"01/04/2003"  
"02/04/2003"  
"03/04/2003"  
"08/04/2003"  
"09/04/2003"  
"10/04/2003"  
"11/04/2003"  
"14/04/2003"  
"15/04/2003"  
"16/04/2003"  
"17/04/2003"  
"18/04/2003"  
"21/04/2003"  
"22/04/2003"  
"23/04/2003"  
"24/04/2003"  
"25/04/2003"  
"28/04/2003"  
"29/04/2003"  
"30/04/2003"  
"01/05/2003"  
"02/05/2003"  
"05/05/2003"  
"06/05/2003"  
"07/05/2003"  
"08/05/2003"  
"09/05/2003"  
"12/05/2003"  
"13/05/2003"  
"14/05/2003"  
"15/05/2003"  
"16/05/2003"  
"19/05/2003"

"20/05/2003"  
"21/05/2003"  
"22/05/2003"  
"23/05/2003"  
"27/05/2003"  
"28/05/2003"  
"29/05/2003"  
"30/05/2003"  
"02/06/2003"  
"03/06/2003"  
"04/06/2003"  
"05/06/2003"  
"06/06/2003"  
"09/06/2003"  
"10/06/2003"  
"11/06/2003"  
"12/06/2003"  
"13/06/2003"  
"16/06/2003"  
"17/06/2003"  
"18/06/2003"  
"19/06/2003"  
"20/06/2003"  
"23/06/2003"  
"24/06/2003"  
"25/06/2003"  
"26/06/2003"  
"27/06/2003"  
"30/06/2003"  
"01/07/2003"  
"02/07/2003"  
"03/07/2003"  
"07/07/2003"  
"08/07/2003"  
"09/07/2003"  
"10/07/2003"  
"11/07/2003"  
"14/07/2003"  
"15/07/2003"  
"16/07/2003"  
"17/07/2003"  
"18/07/2003"  
"21/07/2003"  
"22/07/2003"  
"23/07/2003"  
"24/07/2003"

"25/07/2003"  
"28/07/2003"  
"29/07/2003"  
"30/07/2003"  
"31/07/2003"  
"01/08/2003"  
"04/08/2003"  
"05/08/2003"  
"06/08/2003"  
"07/08/2003"  
"08/08/2003"  
"11/08/2003"  
"12/08/2003"  
"13/08/2003"  
"14/08/2003"  
"15/08/2003"  
"18/08/2003"  
"19/08/2003"  
"20/08/2003"  
"21/08/2003"  
"22/08/2003"  
"25/08/2003"  
"26/08/2003"  
"27/08/2003"  
"28/08/2003"  
"29/08/2003"  
"02/09/2003"  
"03/09/2003"  
"04/09/2003"  
"05/09/2003"  
"08/09/2003"  
"09/09/2003"  
"10/09/2003"  
"11/09/2003"  
"12/09/2003"  
"15/09/2003"  
"16/09/2003"  
"17/09/2003"  
"18/09/2003"  
"19/09/2003"  
"22/09/2003"  
"23/09/2003"  
"24/09/2003"  
"25/09/2003"  
"29/09/2003"  
"30/09/2003"

"01/10/2003"  
"02/10/2003"  
"03/10/2003"  
"06/10/2003"  
"07/10/2003"  
"08/10/2003"  
"09/10/2003"  
"10/10/2003"  
"14/10/2003"  
"15/10/2003"  
"16/10/2003"  
"17/10/2003"  
"20/10/2003"  
"21/10/2003"  
"22/10/2003"  
"23/10/2003"  
"24/10/2003"

**weekday.txt**

1  
2  
3  
4  
5  
1  
2  
3  
4  
5  
2  
3  
4  
5  
1  
2  
3  
4  
5  
1  
2  
3  
4  
5  
2  
3  
4  
5  
1  
2  
3  
4  
5  
1  
2  
3  
4  
5  
1  
2  
3

4  
5  
1  
2  
3  
4  
5  
1  
2  
3  
4  
5  
1  
2  
3  
4  
2  
3  
4  
5  
1  
2  
3  
4  
5  
1  
2  
3  
4  
5  
1  
2  
3  
4  
5  
1  
2  
3  
4  
5  
1  
2  
3  
4  
5  
1



5  
1  
2  
3  
4  
5  
1  
2  
3  
4  
5  
1  
2  
3  
4  
5  
1  
2  
3  
4  
5  
1  
2  
3  
4  
5  
2  
3  
4  
5  
1  
2  
3  
4  
5  
1  
2  
3  
4  
1  
2

3  
4  
5  
1  
2  
3  
4  
5  
2  
3  
4  
5  
1  
2  
3  
4  
5

**data.txt**

208,186,208,289,528,668,866,1085,1470,1656,1843,1877,1953,2034,1947,1951,1928,18  
73,1914,1905,1837,1818,1451,1642,1590,1522,1586,1570,1517,1717,1747,1731,1635,16  
51,1580,1595,1412,1396,1323,1175,996,836,717,726,631,593,641,600,572,528,522,512,  
433,393,394,307,316,315,298,282,236,231,212,164,144,153,134,129  
236,253,224,306,525,652,811,958,1231,1489,1598,1637,1564,1723,1671,1682,1661,169  
5,1639,1573,1634,1640,1494,1523,1509,1465,1579,1429,1548,1577,1501,1454,1469,147  
8,1446,1508,1313,1241,1162,1005,815,762,661,647,565,571,520,485,460,443,438,402,3  
56,353,347,334,277,293,266,262,236,210,159,152,126,120,135,123  
226,234,224,275,483,595,717,883,1210,1389,1496,1556,1531,1564,1547,1582,1579,155  
0,1511,1561,1502,1490,1497,1392,1482,1486,1435,1522,1510,1461,1372,1599,1392,143  
5,1372,1406,1215,1157,1156,945,810,712,721,703,600,556,586,462,461,483,450,399,35  
6,340,331,315,284,283,267,225,211,194,182,183,148,141,123,114  
252,225,265,285,517,623,764,957,1260,1415,1503,1529,1465,1538,1557,1599,1504,157  
4,1502,1498,1407,1501,1445,1425,1404,1356,1427,1440,1473,1497,1385,1521,1380,145  
8,1410,1359,1260,1214,1135,979,823,741,697,681,585,553,467,497,448,442,422,440,33  
0,314,349,275,229,275,281,199,199,219,181,173,150,132,111,70  
266,289,299,369,503,580,782,970,1303,1447,1552,1616,1524,1637,1663,1672,1580,168  
2,1549,1559,1544,1500,1477,1590,1438,1451,1485,1532,1495,1583,1491,1494,1560,140  
4,1510,1380,1341,1318,1182,1079,807,737,664,651,568,495,497,478,404,377,372,302,2  
66,247,235,225,345,372,266,236,211,182,153,126,142,117,90,83  
200,193,223,292,539,615,853,1076,1511,1689,1887,1890,1824,1876,1954,1816,1844,17  
92,1802,1813,1701,1789,1737,1719,1657,1671,1668,1754,1694,1696,1654,1636,1631,15  
34,1549,1659,1549,1473,1339,1202,955,835,833,749,733,705,628,558,539,558,517,473,  
415,370,353,311,307,292,280,241,263,217,206,168,147,146,127,79  
264,244,292,321,597,722,871,1042,1472,1581,1694,1793,1876,1832,1806,1874,1830,19  
11,1765,1713,1613,1681,1565,1631,1529,1529,1524,1709,1548,1586,1525,1520,1537,14  
66,1393,1331,1348,1267,1156,1015,846,736,652,674,550,497,474,477,471,413,412,424,  
378,348,303,298,304,256,269,232,221,195,173,169,138,115,101,66  
287,295,289,359,581,713,877,1012,1381,1580,1641,1560,1638,1645,1620,1637,1716,16  
12,1587,1560,1500,1515,1498,1448,1476,1402,1595,1544,1509,1516,1536,1476,1439,14  
65,1425,1378,1313,1260,1151,956,784,717,694,658,572,572,549,493,473,468,428,439,3  
74,343,309,299,273,271,254,215,193,189,187,178,139,138,101,73  
250,278,291,346,562,650,862,998,1312,1437,1579,1567,1587,1575,1623,1668,1600,157  
3,1566,1530,1480,1473,1428,1469,1405,1485,1482,1394,1443,1548,1489,1448,1476,137  
3,1444,1304,1286,1274,1202,1083,846,761,678,634,611,571,542,518,430,419,412,394,2  
96,305,300,292,280,240,225,235,210,161,207,168,135,131,109,87  
272,315,329,355,539,699,829,991,1330,1467,1579,1637,1633,1665,1644,1656,1640,161  
9,1674,1499,1529,1524,1468,1522,1478,1494,1436,1436,1467,1506,1488,1496,1462,155  
7,1504,1536,1355,1302,1130,1056,872,794,691,619,550,524,467,405,377,354,317,325,2  
89,213,219,206,219,193,165,146,151,155,139,112,112,67,81,68  
202,204,225,281,555,677,858,1150,1608,1818,1923,1960,1939,1975,1944,2031,1870,19  
57,1818,1838,1881,1808,1752,1703,1751,1701,1781,1770,1675,1726,1671,1682,1652,16  
96,1633,1635,1562,1471,1387,1204,951,885,774,800,704,647,626,598,566,568,517,466,  
375,364,372,321,325,284,272,282,232,218,183,174,157,136,104,107

234,223,268,290,632,657,960,1123,1481,1632,1775,1841,1815,1818,1794,1875,1736,17  
32,1749,1769,1619,1620,1558,1540,1628,1711,1568,1525,1555,1593,1532,1583,1576,15  
37,1453,1523,1278,1273,1194,1057,853,837,697,673,596,562,507,542,506,462,414,392,  
356,334,301,289,273,234,224,232,189,188,198,192,139,100,118,96  
256,257,261,288,501,640,807,996,1282,1450,1641,1565,1641,1618,1713,1676,1529,156  
2,1539,1574,1469,1518,1602,1478,1552,1451,1448,1425,1491,1518,1436,1472,1373,145  
4,1437,1443,1294,1248,1177,1026,912,761,691,694,604,585,498,504,431,407,387,378,3  
06,338,304,291,272,253,235,225,203,203,160,155,101,137,98,92  
228,212,241,261,547,615,883,1072,1287,1426,1616,1635,1660,1713,1748,1648,1681,16  
59,1666,1597,1646,1576,1520,1404,1483,1516,1522,1577,1457,1474,1486,1558,1443,15  
82,1471,1551,1422,1317,1218,1050,876,818,695,684,613,492,440,418,395,379,339,322,  
273,242,252,200,187,184,191,137,145,142,143,108,113,113,97,86  
152,146,201,252,473,631,838,1047,1447,1599,1789,1804,1819,1837,1910,1903,1830,18  
15,1769,1799,1787,1746,1756,1673,1698,1758,1783,1700,1672,1733,1662,1861,1671,15  
94,1722,1660,1567,1550,1381,1276,1023,981,858,752,706,645,620,657,574,508,503,460  
,394,404,363,344,328,333,251,217,252,236,185,189,168,135,104,58  
235,238,227,281,509,659,810,1049,1399,1510,1678,1671,1786,1721,1762,1732,1644,16  
74,1588,1671,1599,1605,1520,1514,1486,1515,1556,1580,1547,1506,1506,1494,1402,13  
41,1424,1407,1260,1250,1077,1045,843,754,786,622,583,589,463,433,417,392,359,318,  
318,302,320,274,244,220,245,214,184,170,171,151,152,120,99,96  
208,204,262,281,477,594,733,913,1266,1348,1518,1549,1554,1588,1567,1639,1560,162  
4,1539,1585,1505,1495,1463,1492,1432,1399,1457,1441,1468,1456,1464,1508,1424,138  
7,1382,1348,1276,1171,1123,977,797,760,693,618,529,575,480,469,418,393,394,382,31  
3,280,284,285,269,260,249,191,209,206,197,144,125,110,113,93  
221,230,293,360,558,580,775,1008,1245,1451,1554,1504,1559,1560,1585,1489,1555,15  
30,1463,1593,1488,1490,1482,1525,1463,1378,1440,1432,1357,1320,1354,1458,1390,13  
47,1382,1279,1248,1275,1191,1069,923,830,694,688,591,569,492,474,429,433,455,422,  
387,303,288,303,289,259,253,240,222,233,188,142,157,144,118,116  
395,327,381,445,700,764,974,1095,1539,1686,1745,1768,1797,1827,1765,1814,1791,17  
84,1724,1758,1541,1626,1527,1569,1538,1511,1529,1564,1564,1558,1592,1694,1669,15  
53,1485,1575,1409,1350,1245,1091,941,866,751,693,613,619,520,532,443,434,421,356,  
335,285,267,266,229,216,187,187,176,178,152,117,131,112,96,112  
297,289,321,382,711,858,1033,1164,1740,1785,1926,2056,2093,2070,2039,2140,2017,2  
028,1928,1890,1875,1835,1830,1869,1745,1786,1829,1769,1737,1789,1833,1825,1841,1  
705,1773,1770,1673,1547,1432,1318,1058,963,821,780,755,710,633,578,552,524,481,47  
2,422,392,404,340,316,325,284,241,262,211,197,192,176,135,105,95  
292,251,300,348,590,600,869,1035,1363,1515,1706,1754,1806,1788,1840,1880,1790,17  
67,1727,1695,1621,1529,1631,1609,1471,1483,1530,1492,1652,1587,1616,1588,1532,16  
00,1472,1446,1353,1329,1224,1098,1179,1092,900,784,689,669,600,557,456,457,440,42  
0,324,354,339,286,360,304,279,262,229,208,201,170,152,133,113,88  
281,254,346,350,594,722,875,1053,1387,1504,1645,1736,1711,1675,1590,1605,1569,15  
56,1507,1509,1512,1469,1453,1541,1467,1463,1477,1440,1407,1443,1425,1507,1468,15  
03,1472,1493,1312,1280,1152,1078,882,772,751,664,591,548,504,497,434,412,434,414,  
362,366,320,257,273,265,240,239,222,187,188,174,160,120,125,95  
280,277,325,365,579,649,829,1023,1379,1500,1553,1591,1631,1608,1608,1696,1545,15  
46,1586,1521,1386,1485,1383,1399,1365,1377,1369,1463,1398,1450,1387,1422,1510,13

91,1359,1397,1328,1219,1042,1059,869,792,707,651,556,477,429,432,423,350,395,353,  
298,285,262,298,259,247,235,217,201,176,170,137,130,123,93,86  
247,218,265,320,494,587,717,870,1163,1316,1455,1476,1514,1601,1529,1685,1593,163  
0,1515,1591,1483,1476,1431,1472,1337,1385,1414,1421,1359,1374,1491,1481,1428,138  
1,1364,1311,1216,1122,1129,1063,854,701,664,586,499,434,409,368,378,336,337,311,2  
63,241,255,204,212,184,156,155,158,153,119,111,122,82,90,80  
228,241,256,377,607,751,939,1107,1615,1742,1869,1789,1912,1886,1897,1918,1821,19  
05,1788,1841,1667,1657,1610,1665,1737,1728,1736,1736,1749,1680,1747,1756,1707,16  
04,1718,1598,1549,1543,1354,1237,1114,976,850,805,706,630,604,569,529,562,495,467  
,368,386,373,296,293,253,277,256,251,205,183,170,154,117,120,104  
238,244,301,361,580,650,887,1021,1386,1527,1706,1739,1727,1747,1714,1690,1647,18  
25,1644,1627,1513,1579,1454,1505,1394,1470,1529,1502,1498,1533,1458,1486,1507,13  
71,1412,1385,1266,1299,1089,1039,881,808,672,648,566,542,482,456,461,431,429,398,  
305,331,316,276,274,260,280,203,210,171,156,145,136,128,105,85  
297,267,308,357,560,706,801,1008,1314,1397,1560,1629,1527,1567,1535,1533,1573,15  
56,1538,1537,1401,1415,1484,1389,1332,1453,1407,1433,1389,1456,1366,1455,1458,13  
66,1415,1379,1250,1294,1166,1092,906,827,661,641,574,543,504,429,423,453,396,403,  
318,297,308,269,265,248,241,225,209,180,154,136,139,118,100,84  
340,272,345,410,631,728,940,1084,1277,1529,1614,1650,1581,1568,1677,1625,1697,15  
83,1596,1561,1479,1430,1503,1439,1366,1493,1451,1417,1428,1449,1443,1375,1376,14  
06,1331,1314,1352,1205,1069,994,791,692,652,564,486,434,401,403,378,351,320,279,2  
51,216,215,180,176,162,151,140,129,111,131,110,100,80,70,76  
178,165,239,242,410,501,667,804,1145,1337,1431,1509,1518,1589,1602,1599,1588,159  
3,1564,1549,1370,1431,1440,1558,1452,1467,1532,1530,1504,1470,1515,1400,1381,141  
6,1456,1302,1281,1116,1087,1002,891,763,705,637,555,549,468,441,424,405,423,387,3  
27,339,305,276,270,254,263,220,192,184,170,142,157,112,118,114  
262,230,326,353,580,709,868,1014,1310,1505,1619,1752,1729,1779,1715,1819,1702,17  
07,1691,1645,1562,1551,1555,1459,1496,1480,1487,1515,1534,1522,1600,1539,1443,12  
92,1278,1326,1292,1227,1186,1152,903,792,730,640,559,539,515,501,525,477,434,445,  
360,391,284,304,283,262,272,224,222,192,194,184,162,157,114,90  
283,266,322,366,573,689,811,995,1303,1433,1513,1640,1609,1661,1658,1670,1598,158  
7,1512,1522,1446,1479,1463,1365,1337,1474,1440,1413,1416,1435,1416,1402,1340,141  
8,1312,1341,1255,1295,1105,1067,909,839,677,647,521,540,478,492,442,412,420,404,3  
05,298,284,284,258,260,224,243,204,196,165,127,134,121,109,107  
296,252,318,395,646,677,804,1055,1400,1537,1683,1647,1676,1674,1680,1636,1688,15  
99,1640,1559,1619,1471,1484,1475,1510,1527,1469,1470,1434,1405,1380,1603,1463,14  
45,1406,1394,1334,1222,1147,1051,779,749,645,635,506,461,467,438,425,329,323,284,  
278,286,207,261,222,203,189,169,139,154,126,119,98,111,96,73  
232,208,249,324,599,725,932,1029,1524,1761,1897,1906,1887,1894,1926,1937,2001,19  
28,1786,1850,1767,1778,1696,1684,1655,1766,1736,1721,1719,1804,1731,1713,1677,16  
95,1689,1712,1639,1491,1468,1310,1077,985,892,807,671,610,544,498,506,548,479,450  
,414,387,365,373,296,272,248,256,242,217,196,171,162,146,112,108  
293,260,343,392,628,775,892,1141,1502,1552,1685,1695,1794,1782,1750,1745,1834,22  
88,1654,1782,1801,1623,1751,1676,1768,1598,1657,1628,1648,1598,1617,1630,1563,16  
24,1462,1431,1356,1357,1272,1173,954,847,712,669,584,505,520,457,477,457,397,412,  
331,334,343,330,304,301,263,211,207,194,182,174,123,127,93,81

275,279,287,368,544,649,849,973,1355,1479,1553,1576,1591,1617,1641,1669,1654,157  
8,1641,1575,1515,1473,1489,1471,1422,1449,1535,1438,1377,1465,1377,1321,1383,129  
9,1336,1339,1230,1198,1114,1225,1087,1032,852,786,531,499,464,416,387,398,407,364  
,331,299,282,278,264,258,247,250,183,200,200,130,124,116,109,81  
285,283,283,348,558,691,823,1061,1326,1521,1531,1552,1559,1647,1651,1727,1637,15  
27,1620,1538,1406,1498,1482,1577,1452,1447,1495,1436,1452,1473,1432,1429,1373,14  
24,1372,1396,1364,1284,1252,1196,922,851,776,755,608,595,493,497,490,471,420,408,  
322,318,302,310,303,252,274,200,226,223,196,165,168,122,111,103  
375,251,317,382,685,736,986,1131,1456,1600,1704,1826,1777,1806,1831,1775,1764,17  
97,1713,1681,1730,1599,1577,1586,1521,1599,1573,1564,1563,1572,1525,1643,1488,14  
78,1492,1595,1435,1409,1260,1187,962,908,821,713,625,580,479,440,435,395,370,342,  
279,272,254,280,223,207,196,188,180,139,189,140,102,95,109,79  
350,309,332,433,767,836,1055,1209,1720,1712,1975,2073,2005,2028,2106,2068,1962,1  
962,1893,1922,1809,1880,1785,1798,1739,1692,1810,1752,1808,1762,1740,1783,1676,1  
706,1671,1610,1594,1539,1400,1332,1137,1056,938,819,722,664,619,620,563,570,488,4  
43,418,345,358,329,313,311,275,270,226,210,163,151,123,124,122,82  
306,231,333,389,629,756,903,1066,1498,1587,1770,1817,1830,1802,1775,1734,1742,17  
57,1752,1604,1613,1612,1625,1540,1550,1545,1499,1588,1513,1476,1527,1568,1529,14  
98,1476,1458,1377,1309,1180,1143,897,819,796,674,581,615,508,501,471,501,424,422,  
368,322,313,282,285,274,250,252,212,201,197,160,141,127,106,87  
259,261,272,377,572,683,812,951,1218,1424,1540,1549,1631,1641,1663,1671,1597,161  
3,1563,1518,1582,1498,1523,1527,1478,1498,1472,1485,1443,1545,1460,1429,1438,139  
1,1397,1403,1244,1289,1147,1084,860,796,739,741,605,557,478,431,454,427,406,403,3  
30,294,335,259,293,236,258,236,202,206,169,171,125,104,117,94  
257,192,259,296,513,628,759,871,1215,1308,1417,1538,1507,1448,1450,1440,1518,148  
3,1467,1387,1295,1365,1292,1235,1359,1306,1342,1335,1355,1352,1289,1299,1304,131  
6,1257,1182,1142,1044,959,894,733,767,626,534,523,482,400,376,339,335,358,237,252,  
248,277,277,249,233,233,193,176,183,163,163,140,106,96,72  
314,283,317,361,631,720,878,1036,1392,1511,1637,1655,1589,1706,1653,1579,1589,15  
55,1569,1605,1433,1436,1470,1418,1393,1454,1423,1473,1397,1380,1488,1463,1411,14  
69,1425,1348,1385,1255,1209,1079,865,857,795,683,574,553,477,423,397,404,351,312,  
300,246,249,216,207,214,182,166,143,156,138,140,110,95,76,61  
258,256,313,362,661,793,984,1165,1646,1738,1883,1858,1989,2071,1984,1940,1917,19  
33,1866,1918,1773,1789,1746,1782,1745,1728,1784,1726,1751,1681,1840,1785,1687,17  
39,1645,1682,1561,1479,1327,1302,1091,944,906,804,684,689,627,550,577,479,478,475  
,454,422,391,307,333,257,257,242,217,220,150,160,160,92,94,113  
291,261,351,400,640,744,939,1098,1480,1600,1787,1790,1823,1742,1813,1789,1723,17  
15,1655,1667,1631,1588,1581,1577,1537,1501,1513,1487,1525,1557,1491,1513,1409,13  
79,1428,1346,1249,1299,1086,1029,855,779,689,681,552,565,507,538,459,428,410,420,  
338,328,335,265,275,283,237,214,194,202,195,146,138,112,107,83  
334,278,323,410,648,687,882,1009,1416,1537,1616,1648,1671,1639,1634,1617,1593,15  
82,1612,1551,1480,1518,1506,1441,1438,1510,1424,1420,1428,1435,1406,1426,1485,13  
50,1390,1342,1278,1230,1182,1000,860,772,740,611,634,543,508,472,460,452,425,369,  
335,308,291,282,240,243,222,226,199,158,168,139,132,133,108,78  
299,254,306,372,583,635,831,995,1235,1394,1539,1565,1590,1615,1542,1624,1530,146  
0,1439,1454,1418,1351,1509,1363,1366,1420,1392,1350,1381,1307,1413,1445,1357,135

7,1356,1345,1245,1191,1113,1068,868,905,692,637,603,559,479,473,408,419,352,358,3  
38,293,288,254,244,283,206,234,207,182,175,170,128,115,117,92  
354,256,333,388,658,718,919,1041,1469,1584,1739,1743,1713,1712,1729,1719,1655,16  
08,1538,1484,1630,1510,1485,1512,1483,1435,1451,1452,1470,1490,1464,1451,1454,15  
12,1451,1466,1354,1338,1316,1159,925,834,786,659,597,599,486,446,374,361,348,340,  
266,248,273,249,210,210,169,166,129,145,133,114,104,100,77,74  
285,237,264,369,666,727,996,1151,1520,1826,1815,1880,1799,1885,1859,1782,1809,17  
99,1845,1720,1661,1643,1745,1570,1564,1626,1538,1597,1640,1660,1687,1750,1566,16  
03,1575,1655,1482,1431,1281,1234,978,995,852,798,682,648,614,568,554,521,528,455,  
321,356,346,362,345,331,329,276,236,215,188,149,145,120,136,101  
329,304,357,384,641,786,944,1100,1484,1544,1793,1852,1772,1748,1827,1775,1724,17  
17,1606,1585,1552,1501,1529,1473,1453,1422,1494,1458,1487,1492,1498,1438,1386,13  
60,1446,1325,1219,1246,1176,1086,804,794,707,677,546,524,488,417,455,438,418,396,  
303,327,322,294,259,233,226,220,191,211,178,121,148,117,91,52  
351,326,372,397,556,724,876,999,1368,1502,1723,1655,1744,1634,1667,1640,1570,158  
5,1565,1498,1484,1490,1402,1422,1469,1392,1413,1457,1383,1425,1394,1395,1380,131  
0,1292,1420,1314,1179,1169,1039,872,808,759,645,567,531,506,470,430,408,417,339,2  
91,285,263,300,363,301,265,218,199,146,163,151,91,103,118,75  
278,272,320,377,574,647,805,950,1228,1441,1505,1600,1517,1577,1546,1559,1388,150  
1,1482,1518,1462,1387,1354,1435,1404,1436,1366,1375,1379,1425,1379,1335,1327,129  
1,1360,1343,1231,1152,1166,1003,926,779,782,582,585,557,485,450,425,409,399,354,3  
45,312,284,247,293,275,240,216,185,168,173,138,117,108,91,78  
337,316,351,430,644,740,848,1057,1317,1545,1657,1614,1587,1609,1641,1652,1501,15  
66,1525,1551,1528,1483,1395,1320,1299,1385,1313,1383,1346,1292,1383,1411,1420,14  
70,1438,1438,1261,1202,1123,1055,836,796,748,575,516,549,460,399,409,379,349,323,  
280,270,243,200,243,199,200,164,160,150,157,136,131,107,99,104  
261,247,298,352,618,724,1003,1176,1558,1727,1863,1896,1825,1984,1827,1883,1857,1  
793,1780,1648,1714,1650,1608,1555,1559,1559,1515,1604,1603,1533,1599,1642,1590,1  
555,1562,1562,1455,1395,1252,1261,1040,989,857,829,676,647,545,544,511,538,469,45  
1,363,409,377,340,330,334,282,250,212,229,252,228,212,189,174,110  
367,332,384,433,737,818,1022,1137,1509,1598,1804,1752,1785,1781,1822,1887,1791,1  
631,1705,1683,1600,1630,1557,1519,1441,1477,1491,1489,1407,1446,1426,1339,1398,1  
372,1416,1335,1278,1164,1127,1033,864,755,709,596,525,488,457,436,411,412,405,410  
,351,347,337,291,290,264,251,233,203,181,149,148,124,120,86,76  
310,280,316,366,619,738,841,981,1311,1441,1588,1630,1577,1613,1603,1567,1500,150  
3,1459,1445,1476,1403,1422,1359,1358,1343,1354,1343,1336,1337,1310,1400,1346,134  
3,1301,1279,1176,1102,1056,938,821,755,661,693,546,534,471,484,446,410,423,349,33  
6,322,315,266,267,245,206,213,199,196,164,138,145,104,108,73  
324,297,354,383,624,701,869,965,1295,1395,1535,1501,1597,1579,1581,1581,1600,149  
1,1419,1436,1373,1349,1220,1211,1312,1286,1379,1346,1376,1365,1437,1388,1302,137  
4,1368,1345,1366,1223,1076,1037,846,790,732,623,585,555,469,469,439,404,420,363,3  
09,279,316,281,270,224,250,225,177,168,150,153,145,125,91,79  
401,341,419,468,681,744,959,1047,1308,1589,1547,1594,1649,1652,1611,1608,1562,15  
58,1510,1479,1474,1374,1453,1306,1356,1336,1335,1352,1386,1404,1470,1456,1456,13  
84,1327,1317,1340,1197,1093,1061,851,761,689,703,564,522,476,449,387,323,338,343,  
244,215,200,183,201,165,156,137,140,140,115,122,127,94,76,63

320,283,313,409,723,854,1004,1160,1594,1820,1959,1989,1855,2071,1904,1885,1955,1  
900,1894,1844,1749,1748,1763,1750,1647,1449,1594,1626,1572,1607,1589,1663,1649,1  
587,1626,1596,1450,1501,1347,1321,1069,974,900,833,729,733,615,564,582,556,511,49  
3,401,409,405,358,319,323,285,249,234,213,207,174,121,118,113,93  
463,391,451,487,794,869,1031,1112,1507,1635,1809,1695,1790,1821,1754,1724,1761,1  
776,1612,1655,1498,1526,1522,1517,1449,1479,1478,1511,1480,1392,1473,1501,1377,1  
358,1322,1304,1212,1241,1150,1056,813,764,682,645,610,570,515,502,451,440,423,412  
,347,342,310,291,263,288,229,240,224,183,170,142,131,104,105,78  
343,324,322,406,626,781,889,997,1351,1550,1670,1693,1622,1601,1624,1577,1579,158  
2,1626,1572,1479,1414,1315,1352,1336,1383,1368,1413,1382,1414,1422,1364,1314,136  
5,1334,1308,1270,1232,1118,1025,811,798,706,663,622,530,566,519,444,446,438,406,3  
76,334,318,315,257,287,251,203,201,215,175,150,151,117,100,83  
430,369,375,443,740,814,946,1064,1391,1500,1625,1648,1648,1627,1716,1694,1607,16  
00,1604,1612,1456,1453,1470,1383,1357,1425,1398,1383,1365,1371,1399,1460,1375,13  
65,1357,1339,1283,1294,1104,1037,941,830,730,713,655,595,523,469,454,420,410,373,  
320,280,335,305,244,274,249,226,189,172,166,148,119,97,114,61  
214,229,254,253,447,562,714,864,1170,1431,1498,1569,1593,1705,1617,1602,1548,163  
9,1549,1535,1543,1575,1537,1501,1552,1495,1542,1538,1557,1579,1492,1580,1566,139  
5,1375,1406,1228,1294,1163,1096,929,868,762,754,645,598,539,544,500,446,498,469,3  
53,312,287,317,286,308,280,239,237,207,183,162,171,139,111,92  
247,240,264,288,496,596,652,839,1166,1374,1415,1308,1435,1445,1499,1438,1441,160  
1,1528,1472,1474,1479,1423,1471,1510,1420,1504,1432,1438,1448,1392,1434,1355,129  
8,1343,1404,1278,1303,1075,1086,936,879,724,723,630,567,578,529,469,460,483,457,3  
81,348,332,304,249,255,260,245,257,193,204,178,148,124,115,97  
279,248,306,333,547,605,817,1072,1284,1503,1499,1499,1497,1642,1640,1552,1482,15  
14,1581,1518,1509,1469,1456,1426,1401,1405,1389,1384,1364,1461,1451,1516,1361,13  
05,1416,1409,1381,1211,1191,1140,895,870,763,745,629,578,612,555,503,458,445,441,  
347,321,344,310,271,264,269,232,238,232,187,167,169,157,107,101  
322,268,332,377,569,678,815,948,1254,1482,1522,1498,1625,1585,1617,1606,1278,158  
6,1522,1486,1466,1474,1537,1519,1456,1436,1457,1444,1372,1376,1468,1444,1485,140  
7,1466,1472,1310,1236,1198,1136,918,822,758,762,608,588,526,492,427,416,395,357,3  
33,276,278,260,193,244,206,162,191,146,149,122,106,114,109,94  
203,231,261,313,596,735,889,1134,1510,1734,1974,1836,1906,1922,1976,1890,1834,18  
53,1790,1858,1671,1744,1720,1720,1613,1703,1697,1701,1755,1667,1653,1665,1599,15  
71,1618,1664,1500,1467,1337,1231,1081,1079,843,803,725,766,644,628,569,565,518,47  
0,478,405,428,404,345,314,308,271,273,263,249,211,208,141,128,107  
305,287,382,387,630,768,856,1151,1481,1586,1637,1673,1708,1833,1694,1676,1568,16  
28,1664,1659,1480,1492,1481,1489,1454,1458,1507,1382,1422,1391,1365,1402,1410,12  
92,1301,1253,1229,1123,1095,953,858,732,744,651,591,567,513,502,420,419,374,398,3  
15,319,281,319,322,242,284,251,245,231,190,183,157,128,105,97  
243,292,272,370,534,625,825,921,1212,1324,1521,1505,1440,1449,1530,1539,1415,148  
5,1470,1418,1341,1321,1376,1316,1388,1358,1269,1310,1273,1255,1314,1215,1310,118  
4,1280,1230,1153,1143,975,914,748,766,700,669,618,534,496,457,454,419,377,364,321,  
316,287,242,270,251,258,218,201,178,180,135,140,122,95,72  
273,256,261,359,543,651,743,995,1172,1381,1495,1560,1517,1458,1519,1510,1502,149  
9,1480,1496,1434,1339,1389,1293,1325,1367,1354,1409,1438,1373,1376,1398,1348,132

2,1270,1345,1238,1202,1107,1044,931,878,727,698,633,581,500,501,426,400,383,365,283,277,292,249,253,235,218,208,175,225,170,174,152,96,103,89  
302,269,272,352,530,663,820,909,1247,1467,1485,1522,1575,1536,1644,1562,1511,1582,1474,1433,1366,1429,1315,1437,1302,1243,1299,1273,1264,1225,1262,1204,1184,1151,1107,1021,1011,978,864,812,738,640,584,589,486,439,429,383,389,370,328,288,242,215,202,187,224,167,176,167,153,139,120,132,100,102,68,67  
231,179,229,291,492,690,875,1022,1409,1510,1668,1755,1634,1717,1765,1725,1610,1651,1617,1548,1543,1497,1543,1573,1450,1431,1469,1506,1540,1493,1409,1457,1385,1397,1308,1345,1308,1175,1099,1058,866,839,776,674,652,580,568,562,502,486,491,459,365,323,328,309,292,253,217,223,205,185,176,163,140,141,115,95  
245,229,277,279,529,650,772,915,1230,1429,1552,1566,1635,1716,1729,1660,1578,1648,1553,1514,1518,1449,1472,1447,1371,1391,1432,1356,1388,1438,1366,1422,1367,1381,1349,1311,1210,1123,1100,943,796,777,713,608,524,556,478,431,421,448,420,411,294,293,317,259,250,249,223,204,210,162,172,142,120,126,122,104  
246,253,280,305,485,624,799,911,1226,1349,1486,1512,1502,1458,1527,1524,1441,1528,1493,1431,1376,1391,1353,1317,1330,1306,1343,1295,1361,1341,1339,1339,1312,1279,1208,1256,1145,1126,1003,957,848,740,742,634,577,544,477,484,430,407,397,417,352,331,325,283,304,245,227,198,172,180,162,169,146,113,79,90  
269,223,282,357,548,567,749,918,1220,1364,1402,1467,1516,1467,1526,1530,1509,1503,1388,1395,1321,1337,1371,1346,1282,1256,1252,1222,1225,1309,1310,1371,1237,1216,1278,1258,1133,1200,1106,948,841,726,723,647,571,626,538,506,452,479,430,400,345,278,305,293,297,204,199,214,211,197,189,156,120,119,123,94  
306,259,309,369,591,713,838,986,1258,1402,1497,1496,1515,1518,1574,1565,1468,1488,1473,1367,1293,1321,1303,1299,1243,1305,1322,1254,1289,1223,1273,1246,1279,1314,1299,1188,1141,1075,1043,975,793,732,627,635,539,511,452,470,379,365,348,310,285,234,250,224,216,200,166,170,153,128,132,113,119,95,94,63  
237,210,277,321,612,672,867,1018,1488,1571,1674,1648,1670,1822,1834,1731,1710,1735,1622,1511,1546,1564,1499,1477,1376,1388,1410,1465,1377,1449,1428,1416,1486,1406,1444,1337,1288,1230,1196,1054,881,872,725,665,588,643,588,514,526,511,455,447,386,376,337,326,324,302,270,250,261,224,185,154,123,127,98,110  
274,249,279,362,568,665,824,954,1266,1471,1545,1636,1567,1543,1539,1559,1449,1435,1480,1490,1387,1366,1331,1318,1282,1283,1369,1267,1353,1339,1308,1314,1273,1273,1228,1209,1134,1136,964,963,845,702,677,635,525,530,482,449,449,415,401,376,336,320,276,285,310,273,272,221,217,192,177,168,142,130,118,69  
314,289,313,367,565,678,844,965,1268,1430,1530,1466,1513,1508,1549,1535,1473,1448,1400,1374,1385,1383,1379,1345,1263,1216,1313,1238,1243,1253,1328,1318,1211,1217,1260,1207,1107,1124,1021,923,846,722,659,649,564,540,523,485,410,435,429,391,307,327,312,291,317,239,271,234,202,205,193,176,138,124,108,113  
453,302,386,444,636,743,861,968,1291,1487,1583,1561,1564,1558,1598,1633,1584,1526,1534,1485,1495,1460,1417,1437,1338,1349,1368,1457,1367,1365,1391,1343,1266,1283,1317,1289,1189,1163,1085,1078,922,731,732,687,622,575,560,528,497,460,434,436,368,326,301,274,288,254,255,252,205,215,212,186,152,130,122,96  
395,292,348,400,675,722,914,1011,1375,1483,1554,1625,1578,1590,1657,1543,1528,1489,1488,1451,1412,1409,1345,1376,1398,1330,1362,1344,1394,1333,1384,1394,1309,1281,1242,1309,1262,1141,1076,1085,806,718,686,627,531,518,470,445,404,387,358,345,258,264,214,229,223,187,167,166,142,141,131,116,87,108,89,91

265,228,295,296,592,711,891,1088,1395,1682,1714,1742,1765,1805,1815,1725,1686,17  
63,1675,1695,1597,1562,1592,1581,1537,1509,1482,1490,1569,1540,1545,1538,1486,14  
71,1465,1458,1301,1332,1167,1115,969,923,779,701,710,622,585,621,541,455,484,443,  
329,362,349,362,311,255,247,225,226,183,172,164,156,136,110,75  
273,251,286,354,550,656,766,932,1292,1428,1486,1522,1615,1554,1667,1601,1613,159  
4,1626,1592,1457,1450,1501,1507,1385,1399,1407,1415,1210,1431,1466,1427,1360,128  
0,1387,1329,1267,1168,1097,991,877,731,669,642,566,531,559,523,425,426,440,390,34  
7,322,306,285,294,245,225,236,237,211,176,176,140,119,85,91  
264,282,301,309,513,631,768,952,1183,1363,1474,1494,1490,1421,1532,1458,1432,140  
4,1437,1398,1353,1278,1319,1345,1261,1266,1244,1330,1319,1303,1240,1235,1270,127  
8,1272,1255,1132,1061,1021,953,818,718,607,612,519,518,512,467,437,438,393,372,29  
4,312,258,250,265,266,251,196,199,175,174,138,150,110,90,83  
292,221,271,305,517,568,707,878,1152,1347,1459,1427,1418,1492,1433,1539,1497,145  
9,1429,1381,1351,1357,1347,1262,1329,1351,1263,1303,1271,1278,1330,1331,1333,129  
2,1313,1275,1165,1085,1064,969,882,710,695,648,590,534,526,472,439,415,383,375,33  
0,300,298,257,264,242,233,225,205,195,150,149,129,116,114,99  
280,268,299,374,542,677,839,932,1239,1325,1503,1381,1574,1567,1473,1519,1455,144  
8,1403,1371,1405,1345,1349,1284,1348,1250,1250,1418,1248,1279,1324,1309,1286,133  
8,1310,1292,1224,1100,1036,922,766,738,651,573,554,536,489,408,345,373,364,331,27  
3,261,229,223,181,201,186,190,141,144,176,116,118,109,93,71  
209,214,253,303,542,683,841,952,1399,1525,1752,1729,1834,1853,1803,1724,1646,169  
8,1756,1649,1648,1617,1630,1577,1606,1625,1605,1597,1591,1692,1589,1625,1542,154  
9,1555,1564,1392,1328,1160,1126,964,903,811,781,706,651,580,645,569,526,512,453,4  
32,393,372,310,301,269,295,241,231,212,190,187,158,131,110,85  
304,240,325,367,563,678,846,995,1353,1479,1623,1668,1639,1634,1655,1659,1630,159  
8,1519,1495,1515,1385,1465,1453,1373,1339,1363,1364,1384,1350,1385,1339,1290,132  
3,1363,1244,1151,1132,1022,970,831,718,671,625,593,522,533,484,471,445,446,442,31  
0,309,304,310,251,217,232,229,223,213,187,159,130,119,100,88  
303,271,335,328,551,631,847,924,1215,1345,1507,1545,1615,1505,1476,1521,1486,144  
8,1436,1443,1359,1431,1332,1317,1287,1230,1324,1299,1320,1299,1357,1307,1247,124  
4,1216,1153,1125,1077,1007,923,744,653,645,583,563,550,524,464,455,420,418,382,33  
6,319,275,252,283,223,218,206,177,188,156,137,124,114,98,106  
331,274,307,380,580,679,894,1064,1320,1402,1602,1492,1553,1512,1547,1535,1435,14  
41,1418,1410,1336,1340,1387,1291,1297,1338,1358,1362,1325,1347,1337,1366,1256,12  
70,1233,1328,1237,1191,1026,980,820,715,675,651,588,589,532,468,464,405,432,394,3  
72,333,303,265,251,250,227,212,202,191,161,142,105,113,113,89  
309,268,342,361,619,631,862,963,1267,1430,1552,1576,1612,1527,1535,1555,1516,157  
3,1530,1453,1415,1400,1394,1394,1331,1382,1365,1300,1327,1380,1527,1463,1441,134  
4,1390,1276,1249,1243,1017,1006,947,789,685,632,641,569,480,463,444,411,341,331,2  
89,261,243,228,245,226,195,170,166,138,133,121,96,101,101,74  
208,205,265,357,636,744,999,1147,1546,1685,1908,1894,1903,1842,1853,1863,1814,17  
80,1771,1788,1819,1710,1643,1599,1598,1508,1545,1526,1616,1550,1540,1644,1579,15  
54,1504,1492,1395,1340,1239,1115,993,909,810,800,638,650,590,572,563,513,515,510,  
391,360,373,342,325,257,304,224,247,245,186,173,138,138,116,94  
315,277,319,391,569,686,919,1008,1317,1518,1666,1610,1671,1677,1662,1545,1558,15  
00,1473,1499,1477,1452,1493,1371,1348,1350,1406,1352,1308,1248,1308,1353,1305,12

45,1269,1238,1139,1174,969,1010,718,820,691,630,585,543,482,455,414,421,431,399,3  
12,304,296,236,258,255,215,194,176,195,174,161,137,117,117,74  
278,279,262,320,588,618,757,924,1183,1394,1567,1438,1484,1623,1539,1547,1498,151  
8,1438,1447,1384,1331,1313,1415,1348,1333,1348,1388,1359,1370,1373,1347,1314,140  
0,1344,1266,1177,1132,980,956,812,783,685,612,562,582,475,496,456,428,420,444,315,  
295,279,249,247,225,199,179,165,202,166,148,134,141,92,92  
282,266,294,351,497,630,705,961,1237,1331,1481,1466,1521,1526,1506,1478,1496,147  
6,1392,1436,1362,1387,1298,1336,1337,1373,1333,1342,1339,1335,1326,1311,1266,131  
3,1343,1269,1250,1137,1067,977,893,825,726,608,584,533,485,451,419,445,419,413,35  
3,343,289,283,257,228,243,206,190,177,173,143,126,100,103,107  
333,323,315,324,567,648,754,955,1271,1288,1476,1489,1556,1561,1587,1610,1527,156  
8,1483,1435,1455,1431,1415,1291,1330,1385,1416,1400,1350,1447,1337,1460,1372,131  
7,1269,1303,1203,1173,1066,942,788,762,659,630,573,505,451,429,373,358,355,331,28  
5,280,213,210,163,185,164,146,142,145,122,113,109,94,96,63  
322,314,330,385,710,843,994,1159,1641,1676,1870,1919,1952,1948,1806,1919,1884,18  
63,1795,1764,1736,1698,1666,1688,1715,1732,1695,1750,1662,1723,1650,1605,1672,16  
79,1619,1614,1458,1414,1216,1161,1072,985,850,815,698,716,642,601,520,568,531,515  
,432,417,372,369,356,304,292,257,243,215,200,171,170,144,128,98  
332,283,280,360,625,707,913,1031,1372,1568,1753,1719,1726,1734,1715,1643,1514,14  
56,1566,1618,1549,1524,1540,1444,1403,1405,1476,1409,1470,1435,1264,1493,1454,14  
09,1351,1351,1275,1203,1075,1013,845,776,747,677,596,571,512,566,442,483,428,428,  
366,332,336,337,273,278,290,242,197,190,170,145,140,110,97,100  
306,237,319,417,585,683,822,976,1288,1413,1559,1564,1586,1663,1616,1559,1491,145  
5,1514,1416,1353,1385,1377,1454,1383,1440,1391,1392,1487,1421,1379,1353,1362,133  
0,1371,1367,1251,1257,1123,1107,883,752,729,650,597,561,518,552,447,465,410,394,3  
61,378,326,335,316,311,252,254,201,208,203,191,136,126,119,101  
400,331,445,462,708,765,941,1065,1413,1471,1657,1695,1605,1605,1658,1709,1607,15  
56,1589,1494,1428,1430,1452,1428,1401,1429,1345,1403,1473,1442,1431,1460,1413,13  
20,1402,1328,1208,1266,1076,1018,881,845,698,651,604,588,473,434,406,398,344,356,  
288,275,263,231,228,228,208,201,144,175,148,114,108,124,105,102  
298,274,324,402,668,873,1057,1171,1616,1826,1977,1977,1867,1949,1905,1841,1828,1  
903,1850,1795,1745,1727,1671,1734,1635,1663,1687,1670,1807,1774,1787,1670,1561,1  
628,1568,1631,1432,1427,1284,1267,999,915,882,810,707,674,630,556,571,540,480,485  
,424,390,386,356,352,326,345,297,257,245,248,176,175,140,121,111  
389,324,371,450,711,798,1012,1135,1487,1531,1663,1764,1734,1717,1654,1705,1646,1  
613,1636,1572,1523,1485,1451,1467,1359,1427,1375,1402,1440,1473,1416,1379,1404,1  
358,1299,1308,1270,1229,1087,1011,790,753,677,658,601,532,527,497,438,451,451,398  
,351,350,295,274,264,264,243,189,205,194,183,144,111,129,108,81  
270,270,275,336,532,625,762,931,1270,1387,1576,1479,1587,1596,1606,1694,1557,161  
1,1555,1875,1850,1506,1460,1591,1724,1449,1486,1417,1426,1474,1463,1498,1442,135  
4,1367,1324,1275,1223,1126,994,868,852,711,657,604,592,557,523,477,448,422,402,37  
4,336,340,293,315,257,258,226,199,197,156,154,157,152,102,93  
282,242,302,349,547,694,824,915,1287,1328,1580,1591,1636,1583,1491,1564,1553,154  
2,1436,1451,1419,1462,1371,1412,1410,1435,1419,1463,1387,1347,1309,1385,1341,147  
4,1402,1400,1282,1172,1100,1059,885,841,679,693,587,558,545,491,457,475,416,391,3  
23,302,325,309,283,276,261,202,224,211,194,178,148,127,129,88

302,265,333,406,656,741,867,993,1338,1537,1557,1572,1437,1668,1637,1699,1513,156  
5,1517,1442,1370,1362,1489,2111,1681,1727,1535,1651,1547,1544,1480,1578,1532,144  
2,1358,1441,1269,1201,1101,966,802,718,684,640,537,513,442,446,411,341,336,325,28  
8,252,251,236,209,173,190,191,157,126,134,119,101,118,102,82  
203,164,228,315,563,724,833,1002,1426,1652,1741,1739,1721,1799,1864,1828,1829,18  
26,1707,1730,1727,1674,1741,1632,1628,1601,1552,1623,1536,1546,1558,1604,1587,15  
57,1483,1459,1282,1306,1187,807,642,564,592,527,435,440,354,381,331,338,328,285,2  
30,223,201,219,187,189,164,177,154,148,124,107,76,81,70,61  
321,281,323,364,589,763,887,1083,1342,1460,1644,1613,1568,1563,1651,1644,1616,16  
36,1564,1505,1409,1456,1380,1352,1381,1355,1414,1464,1375,1375,1379,1364,1422,14  
11,1340,1244,1190,1107,997,902,797,743,653,602,568,531,458,466,455,399,389,383,29  
5,297,338,332,292,250,254,250,201,220,185,178,152,140,115,82  
289,250,291,333,584,635,786,912,1252,1453,1461,1491,1502,1531,1536,1559,1438,153  
0,1495,1465,1364,1337,1376,1387,1353,1302,1341,1417,1343,1296,1349,1347,1295,130  
3,1296,1341,1161,1146,1011,1010,806,739,680,606,550,552,530,500,459,407,355,371,3  
00,314,308,322,283,265,241,191,226,182,179,170,130,109,114,96  
310,242,320,361,507,656,819,887,1287,1438,1435,1540,1568,1571,1585,1462,1528,146  
8,1437,1411,1360,1329,1263,1275,1243,1266,1288,1292,1300,1292,1372,1312,1247,137  
1,1288,1335,1176,1126,1062,988,884,756,691,659,541,558,479,478,426,426,400,382,32  
3,272,307,280,274,277,269,249,217,169,182,147,139,127,124,96  
337,295,358,371,578,694,807,952,1283,1502,1557,1598,1610,1653,1623,1630,1626,157  
3,1565,1483,1470,1467,1393,1421,1439,1387,1448,1440,1472,1401,1461,1452,1427,141  
3,1386,1329,1239,1292,1052,1015,848,838,713,628,530,561,464,428,439,400,352,352,2  
84,258,286,250,221,209,179,175,152,156,126,131,125,87,85,95  
277,297,304,377,642,736,968,1100,1455,1625,1851,1834,1842,1881,1889,1934,1829,18  
05,1822,1714,1712,1688,1684,1660,1635,1616,1719,1615,1622,1633,1649,1594,1594,16  
10,1516,1601,1446,1424,1258,1146,899,903,812,786,723,639,645,594,584,498,494,499,  
400,433,402,354,360,321,298,263,240,237,187,192,154,136,110,94  
309,279,287,374,605,658,917,1087,1358,1452,1730,1698,1696,1733,1732,1611,1642,17  
12,1681,1629,1584,1484,1427,1442,1464,1403,1444,1458,1416,1383,1452,1492,1361,14  
24,1391,1370,1269,1253,1085,1001,834,746,648,660,581,554,510,503,420,386,388,343,  
368,356,357,303,268,284,268,231,237,199,176,160,142,132,98,79  
290,244,265,327,546,635,759,888,1247,1297,1478,1581,1595,1635,1641,1657,1584,177  
2,1541,1557,1601,1551,1529,1470,1453,1395,1437,1540,1463,1354,1438,1495,1416,137  
2,1410,1367,1349,1234,1139,1018,861,787,732,674,570,593,522,492,459,444,364,379,3  
35,356,317,336,282,284,226,242,197,198,193,185,143,134,116,94  
286,244,272,362,548,607,807,858,1225,1394,1467,1534,1505,1555,1554,1491,1533,162  
3,1483,1544,1436,1443,1386,1373,1414,1426,1365,1409,1349,1457,1384,1352,1402,141  
3,1343,1311,1222,1202,1076,1052,904,882,738,749,658,566,539,547,457,412,441,394,3  
56,339,336,302,329,283,278,232,245,187,203,187,153,127,123,104  
323,297,327,362,614,674,845,972,1282,1441,1541,1582,1629,1593,1661,1719,1726,163  
7,1540,1516,1483,1477,1452,1451,1423,1441,1440,1377,1372,1411,1389,1458,1441,143  
6,1318,1368,1249,1270,1090,1054,869,803,677,667,561,508,466,479,421,394,383,358,2  
81,271,246,243,204,194,176,150,169,172,136,123,140,109,92,81  
210,204,286,304,592,721,888,1073,1475,1590,1746,1811,1860,1838,1834,1866,1765,17  
35,1718,1731,1711,1660,1580,1596,1539,1499,1503,1537,1600,1643,1568,1500,1464,14

16,1377,1451,1359,1391,1177,1152,935,817,784,763,630,618,590,513,520,468,456,449,  
333,327,342,325,328,322,284,270,248,231,214,212,157,134,128,115  
285,273,307,357,597,690,855,984,1326,1512,1552,1649,1568,1606,1585,1628,1613,151  
8,1544,1547,1461,1422,1313,1271,1393,1411,1340,1331,1299,1362,1314,1353,1263,123  
8,1262,1277,1164,1101,968,940,807,719,621,612,589,516,487,427,414,401,379,323,342,  
283,299,273,292,254,255,204,224,212,213,202,148,132,107,92  
265,238,301,360,533,639,860,858,1265,1360,1455,1480,1597,1624,1539,1534,1549,150  
5,1445,1443,1382,1334,1349,1364,1219,1240,1260,1304,1384,1391,1382,1344,1371,121  
6,1263,1187,1179,1124,1003,870,825,692,700,633,570,533,491,462,443,377,409,388,32  
3,283,297,288,216,264,240,236,208,174,146,181,178,126,95,95  
273,272,320,371,552,659,814,941,1280,1376,1476,1497,1591,1598,1470,1474,1571,147  
1,1403,1410,1272,1320,1328,1318,1323,1335,1335,1262,1336,1396,1340,1426,1262,133  
0,1315,1211,1192,1138,1056,988,793,758,696,632,549,495,518,467,460,416,390,378,29  
2,290,293,301,285,257,218,204,193,199,205,167,144,102,110,84  
305,248,335,390,590,678,833,1002,1345,1465,1557,1535,1614,1686,1614,1646,1511,15  
99,1476,1504,1541,1422,1346,1394,1379,1342,1437,1423,1376,1425,1350,1416,1443,13  
15,1332,1317,1170,1153,1031,994,786,707,647,655,525,511,500,436,360,397,332,332,2  
44,235,237,209,184,193,179,169,147,160,145,116,112,90,94,94  
299,258,303,361,661,868,1026,1208,1493,1669,1966,1899,2014,2046,1964,2064,1909,1  
977,1859,1797,1817,1829,1928,1924,1836,1848,1780,1663,1667,1678,1681,1679,1683,1  
635,1641,1571,1472,1469,1257,1228,1013,939,845,853,651,683,660,597,563,562,478,46  
9,394,364,395,376,380,325,327,291,263,261,216,170,190,147,129,113  
383,290,386,407,736,848,979,1126,1518,1643,1831,1791,1813,1749,1783,1738,1747,17  
18,1723,1582,1595,1541,1465,1508,1464,1508,1522,1562,1436,1500,1487,1516,1434,14  
02,1331,1274,1253,1229,1077,1010,810,809,695,609,562,530,555,501,455,469,421,392,  
377,323,320,316,319,319,292,238,228,240,214,186,172,127,117,86  
333,300,349,393,635,727,951,1015,1364,1455,1692,1654,1732,1714,1743,1615,1600,16  
19,1299,1293,1421,1362,1304,1316,1463,1344,1368,1452,1505,1386,1485,1532,1463,14  
20,1412,1335,1310,1289,1135,1079,882,809,714,658,606,575,512,514,460,467,442,412,  
351,342,318,307,267,281,254,236,242,210,230,214,178,145,128,125  
410,324,354,394,745,798,942,1102,1448,1476,1689,1831,1726,1731,1671,1689,1638,17  
26,1584,1574,1483,1559,1521,1470,1407,1376,1429,1430,1357,1420,1425,1387,1273,13  
08,1274,1272,1188,1149,966,917,799,708,643,609,502,479,469,367,358,343,355,314,28  
5,228,214,190,187,200,204,187,184,146,140,130,101,100,83,73  
293,254,290,372,748,834,1093,1266,1666,1722,1925,1942,2095,2052,2002,2001,2021,2  
015,1860,1831,1770,1923,1848,1829,1787,1765,1863,1797,1751,1788,1823,1734,1649,1  
740,1671,1586,1529,1509,1362,1235,977,907,798,791,679,642,613,595,533,531,510,483  
,448,371,381,377,369,352,282,268,278,236,254,201,155,141,134,105  
375,306,418,446,762,828,1036,1186,1546,1616,1804,1862,1933,1958,1903,1866,1870,1  
869,1755,1761,1687,1693,1669,1678,1625,1715,1617,1670,1673,1588,1568,1640,1535,1  
549,1499,1393,1412,1311,1245,1137,937,847,750,696,592,619,613,559,549,535,486,446  
,405,352,353,327,344,318,293,285,265,260,242,187,190,153,150,107  
306,290,309,385,617,665,880,996,1325,1496,1637,1726,1636,1659,1614,1587,1694,163  
1,1605,1568,1527,1550,1454,1530,1528,1406,1490,1540,1446,1470,1432,1496,1423,141  
3,1370,1398,1272,1284,1108,983,901,813,688,674,562,497,496,501,480,422,424,445,35  
6,319,342,324,297,298,288,234,208,190,184,180,145,137,119,110

293,260,302,378,557,661,859,957,1271,1397,1510,1546,1559,1625,1660,1697,1570,160  
6,1631,1541,1446,1522,1485,1478,1418,1466,1442,1407,1471,1428,1452,1468,1402,139  
4,1415,1428,1330,1310,1127,1057,892,801,736,644,582,556,532,508,460,477,419,417,3  
60,320,320,331,285,271,238,280,244,229,224,232,207,167,164,112  
283,274,278,326,578,663,873,924,1333,1516,1640,1669,1626,1669,1770,1782,1739,170  
5,1640,1691,1669,1603,1577,1593,1584,1460,1515,1469,1526,1509,1567,1613,1534,154  
3,1526,1470,1328,1316,1189,1064,869,816,736,639,562,553,494,504,446,441,357,332,2  
94,301,240,219,227,221,204,218,190,149,135,151,103,114,91,90  
208,197,253,278,580,725,892,1107,1490,1732,1891,1953,1843,1959,1946,1866,1891,19  
05,1865,1930,1843,1767,1733,1794,1744,1728,1745,1828,1778,1732,1788,1716,1735,17  
19,1769,1599,1547,1488,1362,1246,1087,978,833,842,703,678,618,624,560,517,497,483  
,408,368,395,366,367,305,304,247,238,231,221,190,184,140,128,127  
322,291,358,393,658,762,970,1144,1460,1660,1815,1751,1801,1855,1873,1866,1743,18  
05,1668,1728,1609,1661,1638,1577,1549,1466,1609,1603,1532,1574,1627,1609,1465,14  
74,1493,1470,1320,1272,1228,1106,949,780,706,683,594,557,552,503,427,437,399,374,  
335,341,338,342,284,289,258,252,236,238,191,201,154,143,100,89  
267,232,265,382,591,703,850,1033,1341,1527,1599,1668,1668,1690,1718,1727,1728,16  
79,1697,1578,1535,1526,1573,1483,1506,1486,1476,1500,1472,1570,1503,1602,1554,15  
71,1465,1495,1311,1343,1250,1106,904,803,744,684,619,582,570,548,493,479,460,435,  
375,352,380,281,319,264,239,234,254,223,204,184,138,137,129,91  
317,284,340,369,630,725,844,1007,1383,1533,1665,1741,1637,1740,1729,1660,1701,17  
90,1636,1605,1517,1497,1507,1449,1491,1388,1458,1483,1471,1510,1537,1561,1477,13  
56,1408,1345,1375,1330,1246,1075,881,872,746,700,582,592,540,522,447,452,428,394,  
367,345,316,270,291,286,247,260,222,207,197,176,173,128,137,80  
327,333,339,401,662,741,882,1049,1420,1537,1726,1750,1752,1706,1632,1676,1670,16  
90,1635,1616,1526,1487,1549,1490,1505,1533,1488,1472,1470,1568,1536,1517,1421,14  
47,1380,1378,1357,1309,1189,1005,930,823,708,628,559,532,496,432,381,422,345,300,  
308,242,240,229,197,189,190,163,144,142,152,127,103,106,79,73  
234,226,261,309,610,734,933,1107,1556,1661,1909,2017,1940,2030,1994,2007,1945,19  
63,1886,1789,1803,1802,1798,1797,1702,1737,1741,1781,1737,1734,1681,1748,1655,16  
93,1669,1652,1563,1413,1327,1230,1051,946,867,770,670,662,652,593,535,518,526,504  
,428,399,392,351,304,343,289,257,243,233,217,158,162,142,114,122  
273,266,273,330,627,702,923,1111,1367,1600,1790,1806,1806,1730,1771,1762,1685,17  
84,1651,1666,1667,1635,1595,1607,1568,1563,1485,1489,1506,1533,1524,1517,1490,14  
94,1444,1448,1300,1268,1127,1078,842,757,698,663,591,569,546,489,507,432,459,440,  
315,350,362,307,299,268,248,255,218,194,173,201,133,119,111,94  
269,221,278,319,535,639,788,886,1265,1470,1596,1651,1668,1788,1671,1737,1682,171  
0,1646,1576,1582,1519,1595,1553,1567,1600,1450,1630,1545,1558,1525,1497,1515,148  
9,1475,1456,1394,1271,1188,1063,908,866,729,690,595,577,567,541,475,423,400,392,3  
73,376,334,312,325,320,256,257,261,207,210,142,155,138,130,93  
270,267,300,332,558,674,803,1039,1366,1420,1617,1685,1709,1725,1631,1643,1601,16  
32,1628,1721,1585,1563,1536,1520,1479,1548,1509,1482,1547,1534,1510,1569,1517,14  
64,1439,1470,1346,1385,1175,1121,983,853,781,802,665,638,569,533,470,466,424,409,  
374,302,334,300,337,274,284,280,221,250,214,181,147,155,126,94  
312,296,334,367,588,734,928,1087,1394,1596,1613,1749,1708,1693,1716,1689,1722,16  
77,1628,1566,1460,1470,1460,1504,1454,1444,1521,1485,1452,1457,1468,1491,1451,14

04,1345,1319,1307,1250,1104,1092,892,788,672,670,558,521,482,461,449,392,344,304,  
256,252,246,249,230,210,163,174,164,144,138,130,113,104,86,69  
238,209,283,370,663,830,916,1200,1620,1786,1961,2000,1930,2074,2018,2444,2349,22  
26,2014,1990,1934,1967,1989,1917,1844,1912,1886,1826,1776,1755,1779,1726,1724,17  
50,1647,1661,1524,1495,1272,1204,975,901,855,764,662,635,622,630,547,566,506,475,  
404,379,349,372,350,325,308,304,258,228,193,202,148,146,129,120  
287,267,318,353,639,746,937,1140,1464,1591,1761,1720,1818,1803,1866,1838,1867,17  
52,1781,1777,1609,1637,1598,1613,1538,1488,1528,1576,1541,1552,1461,1490,1552,14  
96,1451,1405,1301,1271,1118,1047,875,849,741,690,652,638,621,487,459,457,442,424,  
347,326,348,320,301,314,299,238,226,220,217,193,140,111,103,99  
307,286,312,399,596,720,908,1004,1322,1465,1681,1594,1648,1615,1627,1693,1627,16  
29,1626,1550,1531,1567,1541,1473,1535,1530,1417,1456,1499,1523,1536,1496,1454,14  
66,1467,1478,1281,1266,1150,1111,877,850,748,676,633,609,581,549,493,469,442,455,  
322,335,323,371,290,281,296,264,239,249,211,173,210,138,140,90  
353,309,376,436,669,763,959,1130,1440,1632,1668,1716,1741,1834,1806,1812,1798,16  
90,1633,1676,1563,1560,1621,1556,1554,1571,1562,1570,1621,1566,1517,1565,1441,15  
09,1528,1455,1378,1293,1216,1139,1007,906,839,764,692,670,590,567,540,502,491,492  
,407,375,454,682,435,412,348,275,290,257,257,200,179,164,158,143  
419,329,414,467,773,878,1040,1207,1552,1714,1803,1857,1889,1959,1842,1855,1882,1  
832,1763,1702,1600,1674,1757,1609,1653,1617,1521,1632,1589,1634,1657,1616,1606,1  
557,1482,1542,1355,1328,1243,1164,1014,923,745,732,666,586,545,536,482,483,408,43  
0,307,323,256,258,235,269,204,201,182,179,168,135,126,116,103,93  
275,235,272,355,692,871,992,1247,1643,1854,2048,2033,2054,2124,2094,2116,2068,20  
71,1997,1988,1941,1847,1793,1889,1834,1808,1806,1820,1780,1812,1812,1927,1720,17  
19,1586,1718,1555,1581,1369,1237,1074,1013,809,788,722,709,717,676,554,482,453,45  
1,421,429,431,377,398,349,323,319,234,242,218,199,188,163,115,97  
327,299,351,422,683,773,987,1165,1459,1617,1773,1858,1816,1908,1864,1912,1863,17  
70,1670,1647,1618,1648,1707,1678,1591,1657,1619,1609,1575,1625,1706,1642,1633,17  
48,1527,1487,1387,1327,1169,1069,871,891,775,655,568,572,558,548,498,439,451,444,  
400,342,318,314,320,267,265,240,237,208,199,210,144,131,138,97  
289,285,315,349,568,755,896,1055,1401,1550,1713,1802,1744,1765,1707,1795,1776,17  
66,1626,1657,1497,1589,1554,1521,1452,1522,1510,1479,1455,1576,1506,1435,1471,14  
32,1435,1430,1296,1225,1166,1101,870,898,785,660,620,623,558,544,454,456,392,449,  
356,331,332,333,289,257,283,257,226,213,182,167,157,152,107,101  
302,300,281,324,624,682,847,1102,1363,1432,1670,1689,1649,1615,1682,1610,1615,17  
16,1566,1481,874,1440,1485,1442,1475,1465,1368,1484,1461,1452,1519,1476,1397,143  
4,1340,1388,1268,1299,1083,1126,894,813,563,662,584,571,560,493,495,457,421,394,3  
81,323,286,263,250,282,272,226,218,209,202,168,132,140,128,84  
299,261,274,385,561,675,829,940,1303,1495,1608,1670,1651,1679,1732,1757,1704,168  
0,1593,1586,1471,1539,1563,1384,1569,1507,1490,1523,1416,1457,1439,1516,1508,143  
4,1383,1370,1278,1191,1022,1074,870,851,696,617,550,533,515,483,385,347,349,339,2  
59,266,242,211,223,202,173,204,156,165,127,126,110,131,120,92  
193,190,252,317,593,719,919,1132,1595,1641,1871,1917,1864,1796,1883,1892,1916,19  
34,1775,1778,1789,1680,1700,1678,1673,1690,1682,1645,1678,1628,1676,1701,1558,16  
12,1529,1657,1446,1405,1268,1230,939,902,818,797,711,665,620,597,554,565,469,480,  
419,354,365,368,322,295,318,271,217,213,201,165,135,138,126,117

270,267,323,347,572,677,891,1036,1373,1579,1695,1718,1746,1716,1733,1698,1712,16  
74,1569,1604,1660,1625,1627,1585,1468,1569,1654,1602,1560,1574,1553,1569,1415,14  
38,1412,1418,1465,1287,1313,1096,923,833,862,679,571,572,535,496,504,485,459,379,  
371,324,324,299,275,272,236,221,200,206,194,185,135,143,120,111  
263,245,261,344,573,633,790,904,1244,1433,1552,1617,1589,1655,1672,1635,1626,162  
2,1626,1585,1513,1547,1528,1432,1427,1401,1468,1410,1444,1512,1432,1513,1430,130  
2,1385,1387,1239,1166,1055,1015,882,808,654,611,598,558,552,524,484,421,438,387,3  
12,299,278,259,296,267,233,220,220,194,180,152,167,138,122,93  
317,259,275,361,583,726,877,1044,1294,1415,1528,1584,1613,1621,1647,1594,1671,14  
89,1514,1480,1457,1416,1450,1399,1333,1406,1359,1339,1389,1388,1481,1326,1413,13  
62,1258,1268,1166,1095,974,803,618,555,538,488,489,424,430,320,337,319,285,231,23  
3,272,228,194,201,207,161,186,155,156,114,120,110,99,93,66  
334,312,358,461,598,714,869,995,1335,1502,1497,1544,1555,1584,1557,1599,1572,159  
0,1565,1576,1447,1423,1388,1397,1345,1375,1335,1324,1361,1421,1304,1397,1334,136  
3,1338,1305,1222,1224,1016,990,822,733,655,609,564,532,515,475,384,404,370,332,25  
7,255,277,203,215,223,176,196,149,168,136,120,126,110,94,79  
255,225,246,330,638,771,966,1165,1510,1666,1808,1879,1828,1939,1947,1962,1832,18  
86,1820,1765,1715,1754,1684,1700,1708,1655,1611,1731,1696,1674,1674,1644,1663,17  
17,1630,1652,1458,1454,1251,1202,984,953,815,731,718,697,623,583,524,489,513,445,  
389,369,397,344,375,339,293,267,277,218,222,189,162,160,147,100  
285,241,296,353,612,707,894,1097,1363,1483,1678,1690,1706,1799,1655,1778,1707,16  
06,1671,1546,1485,1462,1494,1508,1490,1453,1479,1457,1441,1419,1419,1417,1413,13  
99,1332,1334,1199,1242,1085,937,808,773,673,638,615,534,501,490,433,387,417,407,3  
48,283,297,292,268,262,242,244,213,195,176,150,175,155,121,104  
283,249,310,377,582,656,826,985,1306,1463,1544,1511,1573,1596,1602,1566,1512,155  
1,1506,1585,1516,1444,1363,1463,1370,1344,1363,1346,1394,1429,1348,1360,1332,135  
6,1221,1256,1216,1148,1015,935,804,784,677,640,605,581,528,455,451,426,386,401,34  
2,287,310,291,264,260,256,241,217,172,165,152,121,126,112,101  
299,257,313,358,530,618,833,959,1263,1431,1475,1543,1624,1576,1529,1567,1453,156  
9,1415,1427,1448,1448,1442,1387,1336,1349,1355,1423,1338,1385,1340,1418,1363,138  
7,1249,1397,1259,1237,1099,1029,835,798,705,675,548,553,546,554,500,446,387,424,3  
37,272,277,283,279,239,242,251,220,218,168,176,146,121,115,100  
325,301,321,368,578,656,788,1023,1335,1525,1561,1549,1664,1625,1645,1667,1646,16  
70,1501,1553,1405,1542,1448,1421,1435,1436,1444,1374,1420,1376,1463,1403,1384,13  
59,1318,1318,1229,1128,1122,970,890,830,685,639,561,508,457,445,367,394,330,302,2  
61,222,205,231,237,196,200,175,161,140,157,135,119,99,82,79  
230,208,229,262,589,644,833,996,1383,1584,1736,1814,1846,1896,1887,1845,1809,182  
6,1804,1782,1702,1761,1691,1603,1598,1672,1628,1588,1664,1582,1570,1604,1605,150  
6,1480,1498,1475,1344,1260,1164,978,909,798,696,629,661,534,523,523,471,495,439,3  
88,400,351,369,300,296,286,275,209,204,220,187,143,120,114,108  
282,250,283,377,578,664,855,1035,1370,1538,1636,1645,1690,1733,1730,1646,1664,16  
44,1615,1633,1481,1479,1509,1487,1445,1469,1391,1414,1478,1401,1443,1387,1370,14  
26,1388,1362,1272,1147,1137,1032,793,787,673,636,587,539,545,508,468,439,434,435,  
348,319,325,320,270,269,268,254,219,206,184,175,154,111,107,84  
278,255,303,375,538,640,811,1016,1294,1441,1561,1593,1600,1638,1638,1644,1596,15  
78,1496,1436,1408,1455,1450,1319,1349,1350,1417,1396,1382,1397,1405,1332,1290,12

96,1314,1253,1176,1172,1070,1007,809,784,710,681,610,549,503,479,394,405,362,330,  
273,308,353,262,254,224,236,217,177,208,169,186,170,131,114,97  
275,268,320,396,617,677,839,937,1278,1464,1545,1580,1562,1551,1573,1538,1653,162  
8,1530,1514,1427,1343,1396,1365,1385,1390,1375,1391,1474,1406,1381,1359,1339,138  
2,1406,1406,1313,1241,1075,1022,812,804,718,698,635,631,563,547,479,450,463,387,3  
40,300,290,296,272,245,265,233,214,236,205,163,134,131,101,108  
396,395,397,454,721,789,976,1208,1385,1625,1734,1711,1750,1779,1791,1762,1684,17  
44,1656,1619,1562,1592,1495,1504,1432,1496,1433,1483,1408,1491,1436,1449,1457,13  
89,1371,1366,1260,1247,1032,968,829,840,711,686,581,535,503,460,406,363,315,304,2  
81,252,217,214,223,206,168,200,138,157,148,102,107,116,89,68  
334,318,344,421,722,852,1080,1252,1653,1795,2000,1958,1997,2044,2066,2052,2008,1  
977,1921,1924,1878,1841,1910,1977,1831,1873,1830,1843,1756,1814,1791,1771,1712,1  
775,1761,1705,1604,1495,1437,1195,1066,1069,915,900,755,751,668,683,615,567,569,5  
26,480,436,447,377,344,354,341,288,289,271,219,197,190,151,135,120  
423,356,368,454,689,813,966,1146,1511,1634,1796,1842,1787,1854,1826,1808,1805,17  
44,1656,1755,1664,1666,1639,1596,1636,1555,1587,1615,1589,1520,1511,1528,1529,15  
44,1524,1472,1270,1238,1116,1133,916,780,744,697,647,606,560,522,446,502,464,478,  
411,346,311,319,332,302,293,261,260,215,229,185,153,128,144,111  
336,277,330,419,605,719,843,1016,1409,1528,1658,1722,1729,1735,1698,1812,1672,17  
26,1568,1559,1565,1545,1591,1530,1450,1497,1538,1527,1501,1490,1423,1478,1417,14  
02,1380,1434,1335,1263,1231,1110,916,840,782,764,665,617,565,615,533,514,434,432,  
339,309,330,312,319,274,284,263,261,228,202,183,155,149,139,116  
372,333,391,417,615,719,893,1074,1396,1587,1620,1592,1689,1651,1619,1705,1595,16  
46,1600,1606,1527,1415,1426,1416,1425,1359,1396,1442,1453,1457,1463,1422,1406,13  
66,1401,1362,1269,1261,1115,1100,837,840,765,668,587,554,513,449,436,411,383,356,  
318,279,277,228,207,249,201,164,181,159,170,129,130,118,94,100  
220,237,258,342,571,701,824,1107,1517,1698,1860,1764,1859,1833,1719,1824,1798,17  
60,1751,1702,1743,1649,1605,1652,1578,1661,1574,1687,1623,1621,1555,1597,1533,14  
56,1447,1427,1446,1393,1175,1139,1006,887,773,763,681,653,566,524,528,469,484,522  
,404,327,342,361,312,311,272,259,238,221,176,148,148,141,103,101  
268,273,338,365,594,674,832,1009,1336,1545,1527,1649,1555,1548,1602,1621,1693,16  
08,1506,1481,1450,1467,1355,1404,1388,1335,1361,1414,1306,1353,1311,1345,1273,13  
19,1278,1265,1231,1109,1014,981,812,776,635,671,574,547,535,531,468,425,375,419,3  
32,310,266,320,270,253,262,224,215,224,185,154,128,122,101,88  
286,267,325,354,528,617,729,941,1222,1395,1548,1533,1498,1487,1569,1541,1612,144  
7,1510,1462,1387,1367,1382,1418,1396,1330,1328,1420,1330,1407,1384,1427,1279,131  
5,1425,1290,1208,1198,1058,983,845,742,705,656,583,555,506,524,415,378,403,376,34  
5,325,341,293,323,302,250,239,223,227,191,202,149,127,106,75  
290,260,330,356,532,668,813,881,1219,1359,1417,1465,1571,1509,1495,1500,1465,142  
1,1491,1420,1426,1414,1382,1324,1379,1491,1425,1438,1342,1419,1368,1335,1299,137  
3,1284,1246,1191,1221,1053,982,771,785,724,596,546,594,528,506,449,427,413,386,27  
8,342,276,281,264,257,244,226,225,212,171,143,138,125,106,101  
334,311,376,441,610,709,847,988,1375,1449,1545,1516,1507,1504,1503,1544,1492,162  
5,1541,1473,1411,1442,1338,1318,1264,1378,1354,1431,1363,1387,1445,1381,1342,134  
9,1352,1373,1213,1235,1051,971,787,760,749,597,538,516,467,401,400,345,313,337,24  
4,231,212,218,188,222,191,152,164,156,127,120,108,106,96,77

265,245,269,345,647,716,890,1028,1407,1685,1809,1735,1830,1888,1901,1776,1802,1800,1732,1730,1624,1709,1570,1540,1568,1551,1605,1590,1663,1596,1550,1548,1491,1520,1523,1442,1394,1326,1193,1061,975,863,780,683,646,645,615,600,511,531,482,464,383,357,336,321,310,307,263,252,228,191,204,201,183,116,93,76  
269,290,268,378,588,679,824,948,1308,1511,1602,1578,1612,1635,1610,1580,1615,1629,1457,1517,1430,1426,1350,1451,1372,1339,1366,1378,1362,1363,1456,1399,1269,1281,1299,1195,1233,1139,1031,969,793,746,675,596,550,590,466,484,443,398,374,380,320,297,270,306,248,250,275,216,216,220,202,151,156,110,91,101  
295,261,340,310,524,615,740,938,1210,1342,1418,1466,1442,1447,1532,1438,1430,1434,1341,1344,1300,1371,1246,1208,1295,1287,1299,1283,1218,1343,1244,1280,1265,1272,1268,1143,1077,1090,922,913,813,682,617,562,550,542,541,448,378,398,379,371,330,356,318,304,301,269,228,232,204,203,177,151,145,139,91,100  
261,289,265,309,509,613,721,878,1108,1301,1426,1393,1439,1445,1368,1397,1337,1441,1403,1399,1248,1309,1345,1214,1310,1284,1278,1349,1219,1278,1259,1303,1249,1200,1234,1193,1174,1101,993,874,768,707,696,690,546,543,484,469,453,398,409,359,321,254,256,270,226,248,252,188,177,171,175,124,115,111,78,95  
275,272,309,326,550,664,790,916,1205,1315,1488,1483,1544,1531,1746,1606,1572,1550,1503,1531,1492,1459,1427,1459,1378,1315,1356,1394,1374,1385,1397,1387,1354,1336,1398,1354,1222,1233,1092,1044,841,819,682,617,550,546,478,454,400,376,353,293,263,271,220,201,201,190,204,189,183,154,128,153,90,93,84,63  
186,217,229,324,520,615,872,1052,1377,1576,1646,1783,1661,1760,1739,1804,2051,1965,1745,1729,1675,1696,1625,1614,1767,1704,1564,1705,1660,1579,1546,1514,1621,1594,1490,1560,1450,1372,1255,1116,974,913,813,706,666,651,553,516,515,467,442,422,411,345,321,310,304,329,309,266,266,246,235,212,197,145,123,101  
275,247,295,338,542,665,802,955,1262,1429,1603,1528,1626,1641,1604,1648,1540,1520,1461,1505,1568,1535,1528,1419,1480,1439,1404,1404,1366,1344,1406,1378,1386,1259,1335,1256,1160,1114,1034,955,829,720,688,578,565,563,564,485,448,405,401,381,303,327,275,267,272,260,259,211,236,216,180,149,144,107,102,94  
277,251,267,337,511,569,786,943,1214,1405,1424,1527,1438,1456,1457,1498,1420,1421,1394,1391,1401,1396,1298,1247,1252,1222,1342,1298,1288,1269,1292,1262,1164,1157,1217,1217,1116,1044,995,919,759,739,621,589,511,480,482,487,455,401,352,355,331,274,297,258,229,233,241,198,196,190,187,139,145,104,100,93  
283,245,275,337,509,589,750,890,1160,1338,1461,1404,1394,1472,1428,1493,1357,1471,1383,1364,1320,1360,1315,1276,1226,1236,1308,1342,1303,1280,1198,1277,1210,1266,1171,1257,1124,1163,1094,965,802,706,713,620,559,540,477,469,423,406,412,338,284,296,275,280,251,247,230,196,208,180,179,161,129,116,122,84  
210,232,234,312,584,663,923,1040,1407,1631,1714,1774,1752,1704,1721,1754,1726,1783,1718,1692,1668,1607,1634,1618,1536,1502,1583,1622,1619,1620,1544,1504,1576,1581,1398,1476,1315,1264,1189,1115,912,811,764,681,644,673,602,569,534,495,480,437,426,405,384,345,329,294,307,242,244,219,209,168,156,142,126,101  
343,284,306,385,612,741,866,1021,1314,1516,1553,1563,1644,1585,1691,1506,1447,1738,1700,1646,1591,1469,1455,1432,1400,1456,1361,1273,1304,1289,1166,1171,1199,1100,1179,1244,1065,1024,913,921,890,737,699,688,585,598,502,478,465,480,421,376,335,300,336,346,320,308,308,262,241,199,180,173,174,133,108,98  
383,302,338,412,606,733,851,949,1327,1440,1491,1480,1611,1548,1536,1597,1577,1585,1519,1478,1509,1383,1455,1395,1441,1393,1420,1349,1407,1291,1385,1372,1252,130

8,1311,1279,1159,1204,1056,997,818,735,702,626,563,562,513,482,438,424,397,417,34  
0,330,321,259,256,256,275,248,218,210,193,172,135,120,112,88  
284,253,324,354,540,665,806,949,1208,1411,1456,1525,1537,1570,1491,1501,1506,150  
1,1533,1472,1411,1456,1373,1401,1420,1336,1309,1324,1305,1379,1294,1363,1337,133  
3,1361,1324,1228,1133,1078,993,902,782,669,677,579,571,490,506,426,437,408,398,32  
4,319,283,275,276,259,250,230,227,205,161,162,151,113,110,86  
389,369,359,461,677,770,901,1098,1408,1505,1644,1625,1585,1561,1639,1670,1605,16  
49,1562,1538,1555,1467,1449,1397,1416,1558,1477,1470,1463,1471,1443,1442,1407,14  
72,1412,1410,1355,1274,1172,981,844,807,742,626,578,556,484,470,427,372,324,302,2  
63,220,261,217,191,214,223,180,169,143,153,132,127,98,88,79  
200,205,243,318,544,656,866,974,1364,1624,1592,1699,1770,1808,1751,1775,1732,171  
0,1680,1689,1689,1627,1528,1535,1486,1490,1585,1469,1532,1465,1520,1458,1465,147  
8,1388,1384,1258,1180,1155,996,905,848,737,738,593,600,556,507,459,450,432,437,34  
3,307,328,284,306,265,274,240,230,203,181,146,150,110,114,97  
258,240,278,333,558,643,752,912,1281,1391,1463,1455,1471,1522,1626,1592,1588,156  
1,1492,1464,1502,1443,1369,1345,1388,1339,1333,1334,1323,1204,1282,1273,1277,126  
6,1176,1213,1124,1080,989,898,817,727,653,610,578,557,495,452,435,423,418,394,309,  
324,297,292,286,265,245,209,215,214,206,179,137,111,103,86  
279,257,278,326,505,648,761,839,1126,1243,1440,1390,1385,1504,1508,1448,1456,144  
9,1425,1411,1299,1336,1307,1323,1348,1354,1289,1266,1294,1237,1255,1307,1237,128  
7,1199,1222,1209,1107,1023,828,714,688,659,609,568,500,489,413,443,429,380,354,32  
0,301,279,269,271,234,227,193,212,201,167,136,130,97,94,83  
240,234,288,342,494,639,767,900,1197,1369,1412,1398,1459,1556,1447,1433,1535,146  
3,1484,1432,1417,1395,1295,1354,1313,1297,1284,1246,1294,1291,1306,1296,1247,130  
2,1233,1198,1143,1122,1047,894,780,795,694,583,562,518,497,441,436,373,396,355,28  
9,276,289,283,230,264,231,216,199,179,181,149,153,113,108,107  
262,261,296,332,507,634,793,875,1183,1396,1423,1472,1433,1520,1526,1577,1432,146  
9,1469,1483,1394,1375,1335,1332,1329,1349,1387,1294,1372,1251,1393,1384,1396,133  
5,1395,1273,1180,1126,1029,1037,817,752,649,631,538,530,443,396,369,361,310,274,2  
35,240,247,188,208,157,183,181,142,122,142,120,90,97,81,78  
222,220,267,307,545,717,850,1050,1455,1637,1787,1778,1771,1845,1884,1784,1769,17  
67,1724,1676,1635,1571,1549,1621,1551,1526,1608,1564,1538,1436,1492,1400,1462,14  
60,1442,1423,1339,1303,1129,1048,899,808,739,707,642,607,575,517,477,479,480,482,  
429,348,385,345,315,342,277,236,262,223,169,173,164,142,122,93  
314,291,347,376,624,752,935,1062,1383,1477,2153,1842,1813,1837,1871,1848,1821,17  
91,1684,1697,1623,1672,1524,1480,1511,1567,1505,1580,1487,1494,1489,1451,1396,13  
38,1285,1361,1280,1184,1080,937,843,745,673,594,526,527,513,464,371,408,387,321,3  
10,291,335,297,317,258,233,220,217,228,190,181,157,120,99,85  
318,298,322,391,562,647,883,1054,1349,1488,1546,1551,1576,1564,1583,1588,1556,15  
41,1468,1483,1387,1334,1373,1385,1414,1420,1379,1333,1374,1344,1359,1337,1312,13  
82,1309,1284,1187,1148,1048,1039,821,829,720,621,513,512,454,471,377,451,401,400,  
343,274,249,269,250,273,209,193,205,222,162,166,128,98,85,94  
352,338,309,455,692,727,947,1010,1315,1465,1600,1640,1604,1635,1523,1542,1540,14  
74,1531,1449,1380,1412,1404,1392,1400,1333,1393,1333,1323,1382,1349,1380,1319,12  
67,1332,1279,1228,1197,1055,974,828,736,631,598,473,449,420,383,388,324,335,279,2  
57,234,225,200,196,201,166,169,152,127,137,113,108,98,73,74

180,181,209,269,525,655,843,966,1408,1632,1722,1772,1798,1684,1708,1760,1710,169  
6,1648,1679,1709,1611,1602,1598,1537,1601,1526,1505,1506,1612,1603,1521,1588,148  
0,1389,1412,1294,1332,1118,1086,927,875,776,708,700,614,568,580,535,481,449,447,4  
07,384,333,345,322,322,286,271,255,239,200,161,147,127,94,95  
261,204,255,302,474,607,768,902,1250,1479,1565,1645,1641,1587,1575,1628,1805,158  
4,1530,1576,1460,1505,1515,1446,1428,1393,1371,1412,1382,1418,1327,1396,1297,132  
1,1345,1367,1542,1378,1348,1293,1304,1249,1089,784,730,709,644,604,519,462,452,38  
8,352,363,379,342,310,325,303,229,199,246,202,183,182,145,130,97  
257,206,272,326,504,588,748,915,1199,1341,1476,1525,1492,1565,1637,1505,1493,157  
6,1480,1400,1412,1451,1357,1363,1327,1361,1429,1320,1288,1397,1367,1401,1314,128  
7,1334,1207,1182,1150,995,988,835,731,637,627,491,539,491,445,405,429,398,341,297,  
321,294,258,256,269,234,240,210,214,177,145,148,121,89,75  
251,240,278,343,506,612,693,876,1113,1341,1399,1506,1462,1457,1444,1491,1454,142  
7,1487,1402,1409,1376,1280,1316,1294,1287,1387,1346,1304,1317,1354,1347,1328,128  
0,1338,1266,1190,1227,1072,944,829,813,660,623,538,513,487,435,465,427,433,372,33  
5,296,274,265,256,262,236,194,180,162,172,162,141,124,82,95  
281,288,275,387,547,629,801,965,1201,1298,1450,1430,1536,1598,1569,1510,1464,150  
2,1428,1366,1422,1437,1399,1356,1377,1284,1344,1362,1428,1345,1351,1335,1331,132  
0,1308,1289,1195,1157,1083,1046,815,735,609,598,571,496,444,428,345,334,346,320,2  
35,241,240,201,208,230,203,215,177,180,142,141,105,92,94,82
